# Supplementary material
Source: PubMed Central journal article supplement (PMC4281939)
Supplement: NIHMS651554-supplement-Supplementary_Data.pdf [file NIHMS651554-supplement-Supplementary_Data.pdf]

## Supporting Information

### Optimization of Potent and Selective Quinazolinones: Inhibitors of Respiratory Syncytial Virus That Block RNA-dependent RNA-polymerase Complex Activity

Daljit S. Matharu,<sup>§</sup> Daniel P. Flaherty,<sup>§</sup> Denise S. Simpson,<sup>§</sup> Chad E. Schroeder,<sup>§</sup> Donghoon Chung,<sup>⊥</sup> Dan Yan,<sup>♠</sup> James W. Noah,<sup>‡</sup> Colleen B. Jonsson,<sup>⊥</sup> E. Lucile White,<sup>‡</sup> Jeffrey Aubé,<sup>§</sup> Richard K. Plemper,<sup>♠</sup> William E. Severson,<sup>⊥</sup> and Jennifer E. Golden<sup>§,\*</sup>

<sup>§</sup>University of Kansas Specialized Chemistry Center, University of Kansas, Lawrence, Kansas 66047, United States

<sup>⊥</sup>Center for Predictive Medicine for Biodefense and Emerging Infectious Diseases, University of Louisville, Louisville, Kentucky 40202, United States

<sup>‡</sup>Southern Research Specialized Biocontainment Screening Center, Southern Research Institute, Birmingham, Alabama 35205, United States

<sup>♠</sup>Institute for Biomedical Sciences, Georgia State University, Atlanta, GA 30303, United States

\*Corresponding author

| <b>Contents</b>                                                          | <b>page</b> |
|--------------------------------------------------------------------------|-------------|
| Solubility assessment protocol                                           | 6           |
| Eurofins Panlabs Hit LeadProfiling Screen results for compound <b>17</b> | 7-8         |
| Eurofins Panlabs Hit LeadProfiling Screen methods                        | 9-27        |

## Solubility assessment protocol

Compound solubility in aqueous solution was measured using an automated kinetic solubility method at the Sanford Burnham Medical Research Institute. The concentration of the compound in a saturated pH-buffered aqueous solution was determined by UV absorbance (250-498 nm) and compared to the spectra of a precipitation-free reference solution. Aqueous solubility was measured in phosphate buffered saline (PBS) at room temperature (23°C). PBS by definition is 137 mM NaCl, 2.7 mM KCl, 10 mM sodium phosphate dibasic, 2 mM potassium phosphate monobasic and a pH of 7.4. Solubility was also assessed in RSV CPE assay media (DMEM/F12(r) (Sigma, Cat # D6434)/ 1x Pen/Strep/Glutamine (Gibco, Cat # 10378) / 2% Heat Inactivated FBS (Gibco Cat # 10082)).

PanLabs (Ricerca) Hit LeadProfiling Screening Report for compound **17** (see next page):

## Profiling Results for Compound 17

| Cat #                                    | Assay Name                                 | Batch* | Spec. | Rep. | Conc. | % Inh. | IC <sub>50</sub> * | K <sub>i</sub> | n <sub>H</sub> | R |
|------------------------------------------|--------------------------------------------|--------|-------|------|-------|--------|--------------------|----------------|----------------|---|
| <b>Compound: 53301904, PT #: 1156014</b> |                                            |        |       |      |       |        |                    |                |                |   |
| 200510                                   | Adenosine A <sub>1</sub>                   | 305599 | hum   | 2    | 10 µM | 4      |                    |                |                |   |
| 200610                                   | Adenosine A <sub>2A</sub>                  | 305600 | hum   | 2    | 10 µM | -3     |                    |                |                |   |
| 200720                                   | Adenosine A <sub>3</sub>                   | 305602 | hum   | 2    | 10 µM | 44     |                    |                |                |   |
| 203100                                   | Adrenergic α <sub>1A</sub>                 | 305613 | rat   | 2    | 10 µM | 22     |                    |                |                |   |
| 203200                                   | Adrenergic α <sub>1B</sub>                 | 305614 | rat   | 2    | 10 µM | 4      |                    |                |                |   |
| 203400                                   | Adrenergic α <sub>1D</sub>                 | 305615 | hum   | 2    | 10 µM | 14     |                    |                |                |   |
| 203620                                   | Adrenergic α <sub>2A</sub>                 | 305616 | hum   | 2    | 10 µM | 16     |                    |                |                |   |
| 204010                                   | Adrenergic β <sub>1</sub>                  | 305603 | hum   | 2    | 10 µM | 22     |                    |                |                |   |
| 204110                                   | Adrenergic β <sub>2</sub>                  | 305604 | hum   | 2    | 10 µM | 1      |                    |                |                |   |
| 285010                                   | Androgen (Testosterone) AR                 | 305773 | rat   | 2    | 10 µM | 34     |                    |                |                |   |
| 212510                                   | Bradykinin B <sub>1</sub>                  | 305625 | hum   | 2    | 10 µM | 3      |                    |                |                |   |
| 212620                                   | Bradykinin B <sub>2</sub>                  | 305626 | hum   | 2    | 10 µM | 12     |                    |                |                |   |
| 214510                                   | Calcium Channel L-Type, Benzothiazepine    | 305776 | rat   | 2    | 10 µM | 52     |                    |                |                |   |
| 214600                                   | Calcium Channel L-Type, Dihydropyridine    | 305794 | rat   | 2    | 10 µM | 70     |                    |                |                |   |
| 216000                                   | Calcium Channel N-Type                     | 305795 | rat   | 2    | 10 µM | 0      |                    |                |                |   |
| 217030                                   | Cannabinoid CB <sub>1</sub>                | 305621 | hum   | 2    | 10 µM | 86     |                    |                |                |   |
| 219500                                   | Dopamine D <sub>1</sub>                    | 305797 | hum   | 2    | 10 µM | 26     |                    |                |                |   |
| 219700                                   | Dopamine D <sub>2S</sub>                   | 305798 | hum   | 2    | 10 µM | 9      |                    |                |                |   |
| 219800                                   | Dopamine D <sub>3</sub>                    | 305799 | hum   | 2    | 10 µM | 19     |                    |                |                |   |
| 219900                                   | Dopamine D <sub>4.2</sub>                  | 305800 | hum   | 2    | 10 µM | 5      |                    |                |                |   |
| 224010                                   | Endothelin ET <sub>A</sub>                 | 305622 | hum   | 2    | 10 µM | 9      |                    |                |                |   |
| 224110                                   | Endothelin ET <sub>B</sub>                 | 305623 | hum   | 2    | 10 µM | -4     |                    |                |                |   |
| 225510                                   | Epidermal Growth Factor (EGF)              | 305638 | hum   | 2    | 10 µM | 11     |                    |                |                |   |
| 226010                                   | Estrogen ERα                               | 305716 | hum   | 2    | 10 µM | 6      |                    |                |                |   |
| 226600                                   | GABA <sub>A</sub> , Flunitrazepam, Central | 305802 | rat   | 2    | 10 µM | -20    |                    |                |                |   |
| 226500                                   | GABA <sub>A</sub> , Muscimol, Central      | 305801 | rat   | 2    | 10 µM | -4     |                    |                |                |   |
| 228610                                   | GABA <sub>B1A</sub>                        | 305888 | hum   | 2    | 10 µM | 3      |                    |                |                |   |
| 232030                                   | Glucocorticoid                             | 305774 | hum   | 2    | 10 µM | 21     |                    |                |                |   |
| 232700                                   | Glutamate, Kainate                         | 305634 | rat   | 2    | 10 µM | -3     |                    |                |                |   |
| 232810                                   | Glutamate, NMDA, Agonism                   | 305632 | rat   | 2    | 10 µM | 2      |                    |                |                |   |
| 232910                                   | Glutamate, NMDA, Glycine                   | 305635 | rat   | 2    | 10 µM | 10     |                    |                |                |   |
| 233000                                   | Glutamate, NMDA, Phencyclidine             | 305803 | rat   | 2    | 10 µM | -2     |                    |                |                |   |
| 239610                                   | Histamine H <sub>1</sub>                   | 305804 | hum   | 2    | 10 µM | 11     |                    |                |                |   |
| 239710                                   | Histamine H <sub>2</sub>                   | 305805 | hum   | 2    | 10 µM | 9      |                    |                |                |   |

Note: Items meeting criteria for significance (≥50% stimulation or inhibition) are highlighted.

\* Batch: Represents compounds tested concurrently in the same assay(s).

R=See Remarks (if any) at end of this section.

ham=Hamster; hum=Human

## Profiling Results for Compound 17

| Cat #  | Assay Name                                          | Batch* | Spec.  | Rep. | Conc. | % Inh. | IC <sub>50</sub> * | K <sub>i</sub> | n <sub>H</sub> | R |
|--------|-----------------------------------------------------|--------|--------|------|-------|--------|--------------------|----------------|----------------|---|
| 239820 | Histamine H <sub>3</sub>                            | 305806 | hum    | 2    | 10 µM | 11     |                    |                |                |   |
| 241000 | Imidazoline I <sub>2</sub> , Central                | 305807 | rat    | 2    | 10 µM | 12     |                    |                |                |   |
| 243520 | Interleukin IL-1                                    | 305639 | mouse  | 2    | 10 µM | 15     |                    |                |                |   |
| 250460 | Leukotriene, Cysteinyl CysLT <sub>1</sub>           | 305750 | hum    | 2    | 10 µM | 22     |                    |                |                |   |
| 251600 | Melatonin MT <sub>1</sub>                           | 305752 | hum    | 2    | 10 µM | 26     |                    |                |                |   |
| 252610 | Muscarinic M <sub>1</sub>                           | 305608 | hum    | 2    | 10 µM | 0      |                    |                |                |   |
| 252710 | Muscarinic M <sub>2</sub>                           | 305609 | hum    | 2    | 10 µM | 4      |                    |                |                |   |
| 252810 | Muscarinic M <sub>3</sub>                           | 305610 | hum    | 2    | 10 µM | 19     |                    |                |                |   |
| 257010 | Neuropeptide Y Y <sub>1</sub>                       | 305636 | hum    | 2    | 10 µM | 13     |                    |                |                |   |
| 257110 | Neuropeptide Y Y <sub>2</sub>                       | 305637 | hum    | 2    | 10 µM | 3      |                    |                |                |   |
| 258590 | Nicotinic Acetylcholine                             | 305811 | hum    | 2    | 10 µM | -47    |                    |                |                | 1 |
| 258700 | Nicotinic Acetylcholine α, Bungarotoxin             | 305812 | hum    | 2    | 10 µM | -2     |                    |                |                |   |
| 260130 | Opiate δ <sub>1</sub> (OP1, DOP)                    | 305631 | hum    | 2    | 10 µM | 13     |                    |                |                |   |
| 260210 | Opiate κ(OP2, KOP)                                  | 305988 | hum    | 2    | 10 µM | 2      |                    |                |                |   |
| 260410 | Opiate μ(OP3, MOP)                                  | 305815 | hum    | 2    | 10 µM | 27     |                    |                |                |   |
| 264500 | Phorbol Ester                                       | 305816 | mouse  | 2    | 10 µM | -1     |                    |                |                |   |
| 265010 | Platelet Activating Factor (PAF)                    | 305687 | hum    | 2    | 10 µM | 43     |                    |                |                |   |
| 265600 | Potassium Channel [K <sub>ATP</sub> ]               | 305817 | ham    | 2    | 10 µM | -2     |                    |                |                |   |
| 265900 | Potassium Channel hERG                              | 305818 | hum    | 2    | 10 µM | 26     |                    |                |                |   |
| 268420 | Prostanoid EP <sub>4</sub>                          | 305819 | hum    | 2    | 10 µM | 25     |                    |                |                |   |
| 268700 | Purinergic P <sub>2X</sub>                          | 305713 | rabbit | 2    | 10 µM | 2      |                    |                |                |   |
| 268810 | Purinergic P <sub>2Y</sub>                          | 305714 | rat    | 2    | 10 µM | 5      |                    |                |                |   |
| 270000 | Rolipram                                            | 305820 | rat    | 2    | 10 µM | 23     |                    |                |                |   |
| 271110 | Serotonin (5-Hydroxytryptamine) 5-HT <sub>1A</sub>  | 305821 | hum    | 2    | 10 µM | -12    |                    |                |                |   |
| 271700 | Serotonin (5-Hydroxytryptamine) 5-HT <sub>2B</sub>  | 305822 | hum    | 2    | 10 µM | 54     |                    |                |                |   |
| 271910 | Serotonin (5-Hydroxytryptamine) 5-HT <sub>3</sub>   | 305720 | hum    | 2    | 10 µM | 28     |                    |                |                |   |
| 278110 | Sigma σ <sub>1</sub>                                | 305823 | hum    | 2    | 10 µM | 4      |                    |                |                |   |
| 255520 | Tachykinin NK <sub>1</sub>                          | 305810 | hum    | 2    | 10 µM | -11    |                    |                |                |   |
| 285900 | Thyroid Hormone                                     | 305624 | rat    | 2    | 10 µM | 29     |                    |                |                |   |
| 220320 | Transporter, Dopamine (DAT)                         | 305619 | hum    | 2    | 10 µM | 27     |                    |                |                |   |
| 226400 | Transporter, GABA                                   | 305882 | rat    | 2    | 10 µM | 2      |                    |                |                |   |
| 204410 | Transporter, Norepinephrine (NET)                   | 305618 | hum    | 2    | 10 µM | 54     |                    |                |                |   |
| 274030 | Transporter, Serotonin (5-Hydroxytryptamine) (SERT) | 305620 | hum    | 2    | 10 µM | 9      |                    |                |                |   |

Note: Items meeting criteria for significance (≥50% stimulation or inhibition) are highlighted.

\* Batch: Represents compounds tested concurrently in the same assay(s).

R=See Remarks (if any) at end of this section.

ham=Hamster; hum=Human

**■ 200510 Adenosine A<sub>1</sub>**

---

|                              |                                                            |                               |                                       |
|------------------------------|------------------------------------------------------------|-------------------------------|---------------------------------------|
| <b>Source:</b>               | Human recombinant CHO cells                                | <b>Ligand:</b>                | 1 nM [ <sup>3</sup> H] DPCPX          |
| <b>Vehicle:</b>              | 1% DMSO                                                    | <b>Non-Specific Ligand:</b>   | 100 μM R(-)-PIA                       |
| <b>Incubation Time/Temp:</b> | 90 minutes @ 25°C                                          | <b>Specific Binding:</b>      | 85% *                                 |
| <b>Incubation Buffer:</b>    | 20 mM HEPES, pH 7.4, 10 mM MgCl <sub>2</sub> , 100 mM NaCl | <b>Quantiation Method:</b>    | Radioligand Binding                   |
| <b>Kd:</b>                   | 1.4 nM *                                                   | <b>Significance Criteria:</b> | ≥50% of max stimulation or inhibition |
|                              |                                                            | <b>Bmax:</b>                  | 2.7 pmole/mg Protein *                |

**■ 200610 Adenosine A<sub>2A</sub>**

---

|                              |                                                                                         |                               |                                       |
|------------------------------|-----------------------------------------------------------------------------------------|-------------------------------|---------------------------------------|
| <b>Source:</b>               | Human recombinant HEK-293 cells                                                         | <b>Ligand:</b>                | 0.05 μM [ <sup>3</sup> H] CGS-21680   |
| <b>Vehicle:</b>              | 1% DMSO                                                                                 | <b>Non-Specific Ligand:</b>   | 50 μM NECA                            |
| <b>Incubation Time/Temp:</b> | 90 minutes @ 25°C                                                                       | <b>Specific Binding:</b>      | 85% *                                 |
| <b>Incubation Buffer:</b>    | 50 mM Tris-HCl, pH 7.4, 10 mM MgCl <sub>2</sub> , 1 mM EDTA, 2 U/mL Adenosine Deaminase | <b>Quantiation Method:</b>    | Radioligand Binding                   |
| <b>Kd:</b>                   | 0.064 μM *                                                                              | <b>Significance Criteria:</b> | ≥50% of max stimulation or inhibition |
|                              |                                                                                         | <b>Bmax:</b>                  | 7 pmole/mg Protein *                  |

**■ 200720 Adenosine A<sub>3</sub>**

---

|                              |                                                                                 |                               |                                       |
|------------------------------|---------------------------------------------------------------------------------|-------------------------------|---------------------------------------|
| <b>Source:</b>               | Human recombinant CHO-K1 cells                                                  | <b>Ligand:</b>                | 0.5 nM [ <sup>125</sup> I] AB-MECA    |
| <b>Vehicle:</b>              | 1% DMSO                                                                         | <b>Non-Specific Ligand:</b>   | 1 μM IB-MECA                          |
| <b>Incubation Time/Temp:</b> | 60 minutes @ 25°C                                                               | <b>Specific Binding:</b>      | 83% *                                 |
| <b>Incubation Buffer:</b>    | 25 mM HEPES, pH 7.4, 5 mM MgCl <sub>2</sub> , 1 mM CaCl <sub>2</sub> , 0.1% BSA | <b>Quantiation Method:</b>    | Radioligand Binding                   |
| <b>Kd:</b>                   | 5.9 nM *                                                                        | <b>Significance Criteria:</b> | ≥50% of max stimulation or inhibition |
|                              |                                                                                 | <b>Bmax:</b>                  | 1.8 pmole/mg Protein *                |

**■ 203100 Adrenergic α<sub>1A</sub>**

---

|                              |                                     |                               |                                       |
|------------------------------|-------------------------------------|-------------------------------|---------------------------------------|
| <b>Source:</b>               | Wistar Rat submaxillary gland       | <b>Ligand:</b>                | 0.25 nM [ <sup>3</sup> H] Prazosin    |
| <b>Vehicle:</b>              | 1% DMSO                             | <b>Non-Specific Ligand:</b>   | 10 μM Phentolamine                    |
| <b>Incubation Time/Temp:</b> | 60 minutes @ 25°C                   | <b>Specific Binding:</b>      | 90% *                                 |
| <b>Incubation Buffer:</b>    | 50 mM Tris-HCl, pH 7.4, 0.5 mM EDTA | <b>Quantiation Method:</b>    | Radioligand Binding                   |
| <b>Kd:</b>                   | 0.17 nM *                           | <b>Significance Criteria:</b> | ≥50% of max stimulation or inhibition |
|                              |                                     | <b>Bmax:</b>                  | 0.18 pmole/mg Protein *               |

---

\* Historical Values

## Profiling Methods:

### ■ 203200 Adrenergic $\alpha_{1B}$

---

|                              |                                     |                               |                                              |
|------------------------------|-------------------------------------|-------------------------------|----------------------------------------------|
| <b>Source:</b>               | Wistar Rat liver                    | <b>Ligand:</b>                | 0.25 nM [ <sup>3</sup> H] Prazosin           |
| <b>Vehicle:</b>              | 1% DMSO                             | <b>Non-Specific Ligand:</b>   | 10 $\mu$ M Phentolamine                      |
| <b>Incubation Time/Temp:</b> | 60 minutes @ 25°C                   | <b>Specific Binding:</b>      | 90% *                                        |
| <b>Incubation Buffer:</b>    | 50 mM Tris-HCl, pH 7.4, 0.5 mM EDTA | <b>Quantiation Method:</b>    | Radioligand Binding                          |
| <b>Kd:</b>                   | 0.31 nM *                           | <b>Significance Criteria:</b> | $\geq 50\%$ of max stimulation or inhibition |
|                              |                                     | <b>Bmax:</b>                  | 0.18 pmole/mg Protein *                      |

### ■ 203400 Adrenergic $\alpha_{1D}$

---

|                              |                                 |                               |                                              |
|------------------------------|---------------------------------|-------------------------------|----------------------------------------------|
| <b>Source:</b>               | Human recombinant HEK-293 cells | <b>Ligand:</b>                | 0.6 nM [ <sup>3</sup> H] Prazosin            |
| <b>Vehicle:</b>              | 1% DMSO                         | <b>Non-Specific Ligand:</b>   | 10 $\mu$ M Phentolamine                      |
| <b>Incubation Time/Temp:</b> | 60 minutes @ 25°C               | <b>Specific Binding:</b>      | 80% *                                        |
| <b>Incubation Buffer:</b>    | 50 mM Tris-HCl, pH 7.4          | <b>Quantiation Method:</b>    | Radioligand Binding                          |
| <b>Kd:</b>                   | 0.58 nM *                       | <b>Significance Criteria:</b> | $\geq 50\%$ of max stimulation or inhibition |
|                              |                                 | <b>Bmax:</b>                  | 0.17 pmole/mg Protein *                      |

### ■ 203620 Adrenergic $\alpha_{2A}$

---

|                              |                                                               |                               |                                              |
|------------------------------|---------------------------------------------------------------|-------------------------------|----------------------------------------------|
| <b>Source:</b>               | Human recombinant insect Sf9 cells                            | <b>Ligand:</b>                | 1 nM [ <sup>3</sup> H] MK-912                |
| <b>Vehicle:</b>              | 1% DMSO                                                       | <b>Non-Specific Ligand:</b>   | 10 $\mu$ M WB-4101                           |
| <b>Incubation Time/Temp:</b> | 60 minutes @ 25°C                                             | <b>Specific Binding:</b>      | 95% *                                        |
| <b>Incubation Buffer:</b>    | 50 mM Tris-HCl, pH 7.4, 12.5 mM MgCl <sub>2</sub> , 2 mM EDTA | <b>Quantiation Method:</b>    | Radioligand Binding                          |
| <b>Kd:</b>                   | 0.6 nM *                                                      | <b>Significance Criteria:</b> | $\geq 50\%$ of max stimulation or inhibition |
|                              |                                                               | <b>Bmax:</b>                  | 4.6 pmole/mg Protein *                       |

### ■ 204010 Adrenergic $\beta_1$

---

|                              |                                                                                                             |                               |                                              |
|------------------------------|-------------------------------------------------------------------------------------------------------------|-------------------------------|----------------------------------------------|
| <b>Source:</b>               | Human recombinant CHO-K1 cells                                                                              | <b>Ligand:</b>                | 0.03 nM [ <sup>125</sup> I] Cyanopindolol    |
| <b>Vehicle:</b>              | 1% DMSO                                                                                                     | <b>Non-Specific Ligand:</b>   | 100 $\mu$ M S(-)-Propranolol                 |
| <b>Incubation Time/Temp:</b> | 2 hours @ 25°C                                                                                              | <b>Specific Binding:</b>      | 95% *                                        |
| <b>Incubation Buffer:</b>    | 50 mM Tris-HCl, pH 7.4, 1.4 mM Ascorbic Acid, 0.001% BSA, 5 mM EDTA, 1.5 mM CaCl <sub>2</sub> , 120 mM NaCl | <b>Quantiation Method:</b>    | Radioligand Binding                          |
| <b>Kd:</b>                   | 0.041 nM *                                                                                                  | <b>Significance Criteria:</b> | $\geq 50\%$ of max stimulation or inhibition |
|                              |                                                                                                             | <b>Bmax:</b>                  | 0.072 pmole/mg Protein *                     |

\* Historical Values

---

**■ 204110** Adrenergic  $\beta_2$ 

---

|                              |                                                                             |                               |                                             |
|------------------------------|-----------------------------------------------------------------------------|-------------------------------|---------------------------------------------|
| <b>Source:</b>               | Human recombinant CHO cells                                                 | <b>Ligand:</b>                | 0.2 nM [ $^3$ H] CGP-12177                  |
| <b>Vehicle:</b>              | 1% DMSO                                                                     | <b>Non-Specific Ligand:</b>   | 10 $\mu$ M ICI-118551                       |
| <b>Incubation Time/Temp:</b> | 60 minutes @ 25°C                                                           | <b>Specific Binding:</b>      | 95% *                                       |
| <b>Incubation Buffer:</b>    | 50 mM Tris-HCl, pH 7.4, 0.5 mM EDTA, 5.0 mM MgCl <sub>2</sub> , 120 mM NaCl | <b>Quantiation Method:</b>    | Radioligand Binding                         |
| <b>Kd:</b>                   | 0.44 nM *                                                                   | <b>Significance Criteria:</b> | $\geq$ 50% of max stimulation or inhibition |
|                              |                                                                             | <b>Bmax:</b>                  | 0.44 pmole/mg Protein *                     |

**■ 285010** Androgen (Testosterone) AR

---

|                              |                                                                                          |                               |                                             |
|------------------------------|------------------------------------------------------------------------------------------|-------------------------------|---------------------------------------------|
| <b>Source:</b>               | Rat recombinant E. coli                                                                  | <b>Ligand:</b>                | 1.5 nM [ $^3$ H] Mibolerone                 |
| <b>Vehicle:</b>              | 1% DMSO                                                                                  | <b>Non-Specific Ligand:</b>   | 10 $\mu$ M Mibolerone                       |
| <b>Incubation Time/Temp:</b> | 4 hours @ 4°C                                                                            | <b>Specific Binding:</b>      | 90% *                                       |
| <b>Incubation Buffer:</b>    | 50 mM Tris-HCl, pH 7.4, 0.8 M NaCl, 10% Glycerol, 2 mM Dithiothreitol, 0.1% BSA, 2% EtOH | <b>Quantiation Method:</b>    | Radioligand Binding                         |
| <b>Kd:</b>                   | 3 nM *                                                                                   | <b>Significance Criteria:</b> | $\geq$ 50% of max stimulation or inhibition |
|                              |                                                                                          | <b>Bmax:</b>                  | 930 pmole/mg Protein *                      |

**■ 212510** Bradykinin B<sub>1</sub>

---

|                              |                                                                                                                 |                               |                                                                  |
|------------------------------|-----------------------------------------------------------------------------------------------------------------|-------------------------------|------------------------------------------------------------------|
| <b>Source:</b>               | Human IMR-90 cells                                                                                              | <b>Ligand:</b>                | 0.5 nM [ $^3$ H] (Des-Arg <sup>10</sup> )-Kallidin               |
| <b>Vehicle:</b>              | 1% DMSO                                                                                                         | <b>Non-Specific Ligand:</b>   | 10 $\mu$ M (Des-Arg <sup>9</sup> , Leu <sup>8</sup> )-Bradykinin |
| <b>Incubation Time/Temp:</b> | 60 minutes @ 25°C                                                                                               | <b>Specific Binding:</b>      | 80% *                                                            |
| <b>Incubation Buffer:</b>    | 20 mM HEPES, pH 7.4, 125 mM N-Methyl-D-glucamine, 5 mM KCl, 1 mM 1,10-Phenanthroline, 140 $\mu$ g/ml Bacitracin | <b>Quantiation Method:</b>    | Radioligand Binding                                              |
| <b>Kd:</b>                   | 0.17 nM *                                                                                                       | <b>Significance Criteria:</b> | $\geq$ 50% of max stimulation or inhibition                      |
|                              |                                                                                                                 | <b>Bmax:</b>                  | 0.55 pmole/mg Protein *                                          |

**■ 212620** Bradykinin B<sub>2</sub>

---

|                              |                                                                                |                               |                                             |
|------------------------------|--------------------------------------------------------------------------------|-------------------------------|---------------------------------------------|
| <b>Source:</b>               | Human recombinant Chem-1 cells                                                 | <b>Ligand:</b>                | 0.5 nM [ $^3$ H] Bradykinin                 |
| <b>Vehicle:</b>              | 1% DMSO                                                                        | <b>Non-Specific Ligand:</b>   | 5 $\mu$ M Bradykinin                        |
| <b>Incubation Time/Temp:</b> | 60 minutes @ 25°C                                                              | <b>Specific Binding:</b>      | 90% *                                       |
| <b>Incubation Buffer:</b>    | 50 mM HEPES, pH 7.4, 0.2% BSA, 1 mM CaCl <sub>2</sub> , 5 mM MgCl <sub>2</sub> | <b>Quantiation Method:</b>    | Radioligand Binding                         |
| <b>Kd:</b>                   | 0.85 nM *                                                                      | <b>Significance Criteria:</b> | $\geq$ 50% of max stimulation or inhibition |
|                              |                                                                                | <b>Bmax:</b>                  | 9.4 pmole/mg Protein *                      |

\* Historical Values

### ■ 214510 Calcium Channel L-Type, Benzothiazepine

---

|                              |                                  |                               |                                       |
|------------------------------|----------------------------------|-------------------------------|---------------------------------------|
| <b>Source:</b>               | Wistar Rat brain                 | <b>Ligand:</b>                | 2 nM [ <sup>3</sup> H] Diltiazem      |
| <b>Vehicle:</b>              | 1% DMSO                          | <b>Non-Specific Ligand:</b>   | 10 µM Diltiazem                       |
| <b>Incubation Time/Temp:</b> | 3 hours @ 4°C                    | <b>Specific Binding:</b>      | 73% *                                 |
| <b>Incubation Buffer:</b>    | 50 mM Tris-HCl, pH 7.4, 0.1% BSA | <b>Quantiation Method:</b>    | Radioligand Binding                   |
| <b>Kd:</b>                   | 0.016 µM *                       | <b>Significance Criteria:</b> | ≥50% of max stimulation or inhibition |
|                              |                                  | <b>Bmax:</b>                  | 0.21 pmole/mg Protein *               |

### ■ 214600 Calcium Channel L-Type, Dihydropyridine

---

|                              |                            |                               |                                       |
|------------------------------|----------------------------|-------------------------------|---------------------------------------|
| <b>Source:</b>               | Wistar Rat cerebral cortex | <b>Ligand:</b>                | 0.1 nM [ <sup>3</sup> H] Nitrendipine |
| <b>Vehicle:</b>              | 1% DMSO                    | <b>Non-Specific Ligand:</b>   | 1 µM Nifedipine                       |
| <b>Incubation Time/Temp:</b> | 90 minutes @ 25°C          | <b>Specific Binding:</b>      | 91% *                                 |
| <b>Incubation Buffer:</b>    | 50 mM Tris-HCl, pH 7.4     | <b>Quantiation Method:</b>    | Radioligand Binding                   |
| <b>Kd:</b>                   | 0.18 nM *                  | <b>Significance Criteria:</b> | ≥50% of max stimulation or inhibition |
|                              |                            | <b>Bmax:</b>                  | 0.23 pmole/mg Protein *               |

### ■ 216000 Calcium Channel N-Type

---

|                              |                                  |                               |                                            |
|------------------------------|----------------------------------|-------------------------------|--------------------------------------------|
| <b>Source:</b>               | Wistar Rat frontal brain         | <b>Ligand:</b>                | 10 pM [ <sup>125</sup> I] ω-Conotoxin GVIA |
| <b>Vehicle:</b>              | 1% DMSO                          | <b>Non-Specific Ligand:</b>   | 0.1 µM ω-Conotoxin GVIA                    |
| <b>Incubation Time/Temp:</b> | 30 minutes @ 4°C                 | <b>Specific Binding:</b>      | 96% *                                      |
| <b>Incubation Buffer:</b>    | 20 mM Tris-HCl, pH 7.4, 0.5% BSA | <b>Quantiation Method:</b>    | Radioligand Binding                        |
| <b>Kd:</b>                   | 0.051 nM *                       | <b>Significance Criteria:</b> | ≥50% of max stimulation or inhibition      |
|                              |                                  | <b>Bmax:</b>                  | 0.88 pmole/mg Protein *                    |

### ■ 217030 Cannabinoid CB<sub>1</sub>

---

|                              |                                                                                    |                               |                                       |
|------------------------------|------------------------------------------------------------------------------------|-------------------------------|---------------------------------------|
| <b>Source:</b>               | Human recombinant Chem-1 cells                                                     | <b>Ligand:</b>                | 2 nM [ <sup>3</sup> H] SR141716A      |
| <b>Vehicle:</b>              | 1% DMSO                                                                            | <b>Non-Specific Ligand:</b>   | 10 µM R(+)-WIN-55,212-2               |
| <b>Incubation Time/Temp:</b> | 90 minutes @ 37°C                                                                  | <b>Specific Binding:</b>      | 70% *                                 |
| <b>Incubation Buffer:</b>    | 50 mM HEPES, pH 7.4, 5 mM MgCl <sub>2</sub> ,<br>1 mM CaCl <sub>2</sub> , 0.2% BSA | <b>Quantiation Method:</b>    | Radioligand Binding                   |
| <b>Kd:</b>                   | 5.9 nM *                                                                           | <b>Significance Criteria:</b> | ≥50% of max stimulation or inhibition |
|                              |                                                                                    | <b>Bmax:</b>                  | 15 pmole/mg Protein *                 |

\* Historical Values

---



**■ 219500 Dopamine D<sub>1</sub>**

---

|                              |                                                                       |                               |                                       |
|------------------------------|-----------------------------------------------------------------------|-------------------------------|---------------------------------------|
| <b>Source:</b>               | Human recombinant CHO cells                                           | <b>Ligand:</b>                | 1.4 nM [ <sup>3</sup> H] SCH-23390    |
| <b>Vehicle:</b>              | 1% DMSO                                                               | <b>Non-Specific Ligand:</b>   | 10 μM (+)-Butaclamol                  |
| <b>Incubation Time/Temp:</b> | 2 hours @ 37°C                                                        | <b>Specific Binding:</b>      | 90% *                                 |
| <b>Incubation Buffer:</b>    | 50 mM Tris-HCl, pH 7.4, 1.4 mM Ascorbic Acid, 0.001% BSA, 150 mM NaCl | <b>Quantiation Method:</b>    | Radioligand Binding                   |
| <b>Kd:</b>                   | 1.4 nM *                                                              | <b>Significance Criteria:</b> | ≥50% of max stimulation or inhibition |
|                              |                                                                       | <b>Bmax:</b>                  | 0.63 pmole/mg Protein *               |

**■ 219700 Dopamine D<sub>2s</sub>**

---

|                              |                                                                       |                               |                                       |
|------------------------------|-----------------------------------------------------------------------|-------------------------------|---------------------------------------|
| <b>Source:</b>               | Human recombinant CHO cells                                           | <b>Ligand:</b>                | 0.16 nM [ <sup>3</sup> H] Spiperone   |
| <b>Vehicle:</b>              | 1% DMSO                                                               | <b>Non-Specific Ligand:</b>   | 10 μM Haloperidol                     |
| <b>Incubation Time/Temp:</b> | 2 hours @ 25°C                                                        | <b>Specific Binding:</b>      | 90% *                                 |
| <b>Incubation Buffer:</b>    | 50 mM Tris-HCl, pH 7.4, 1.4 mM Ascorbic Acid, 0.001% BSA, 150 mM NaCl | <b>Quantiation Method:</b>    | Radioligand Binding                   |
| <b>Kd:</b>                   | 0.09 nM *                                                             | <b>Significance Criteria:</b> | ≥50% of max stimulation or inhibition |
|                              |                                                                       | <b>Bmax:</b>                  | 1.6 pmole/mg Protein *                |

**■ 219800 Dopamine D<sub>3</sub>**

---

|                              |                                                                       |                               |                                       |
|------------------------------|-----------------------------------------------------------------------|-------------------------------|---------------------------------------|
| <b>Source:</b>               | Human recombinant CHO cells                                           | <b>Ligand:</b>                | 0.7 nM [ <sup>3</sup> H] Spiperone    |
| <b>Vehicle:</b>              | 1% DMSO                                                               | <b>Non-Specific Ligand:</b>   | 25 μM S(-)-Sulpiride                  |
| <b>Incubation Time/Temp:</b> | 2 hours @ 37°C                                                        | <b>Specific Binding:</b>      | 85% *                                 |
| <b>Incubation Buffer:</b>    | 50 mM Tris-HCl, pH 7.4, 1.4 mM Ascorbic Acid, 0.001% BSA, 150 mM NaCl | <b>Quantiation Method:</b>    | Radioligand Binding                   |
| <b>Kd:</b>                   | 0.36 nM *                                                             | <b>Significance Criteria:</b> | ≥50% of max stimulation or inhibition |
|                              |                                                                       | <b>Bmax:</b>                  | 1.1 pmole/mg Protein *                |

**■ 219900 Dopamine D<sub>4.2</sub>**

---

|                              |                                                                       |                               |                                       |
|------------------------------|-----------------------------------------------------------------------|-------------------------------|---------------------------------------|
| <b>Source:</b>               | Human recombinant CHO-K1 cells                                        | <b>Ligand:</b>                | 0.5 nM [ <sup>3</sup> H] Spiperone    |
| <b>Vehicle:</b>              | 1% DMSO                                                               | <b>Non-Specific Ligand:</b>   | 10 μM Haloperidol                     |
| <b>Incubation Time/Temp:</b> | 2 hours @ 25°C                                                        | <b>Specific Binding:</b>      | 90% *                                 |
| <b>Incubation Buffer:</b>    | 50 mM Tris-HCl, pH 7.4, 1.4 mM Ascorbic Acid, 0.001% BSA, 150 mM NaCl | <b>Quantiation Method:</b>    | Radioligand Binding                   |
| <b>Kd:</b>                   | 0.32 nM *                                                             | <b>Significance Criteria:</b> | ≥50% of max stimulation or inhibition |
|                              |                                                                       | <b>Bmax:</b>                  | 0.55 pmole/mg Protein *               |

\* Historical Values

---

**■ 224010** Endothelin ET<sub>A</sub>

---

|                              |                                                                             |                               |                                          |
|------------------------------|-----------------------------------------------------------------------------|-------------------------------|------------------------------------------|
| <b>Source:</b>               | Human recombinant CHO-K1 cells                                              | <b>Ligand:</b>                | 0.03 nM [ <sup>125</sup> I] Endothelin-1 |
| <b>Vehicle:</b>              | 1% DMSO                                                                     | <b>Non-Specific Ligand:</b>   | 0.1 μM Endothelin-1                      |
| <b>Incubation Time/Temp:</b> | 2 hours @ 37°C                                                              | <b>Specific Binding:</b>      | 90% *                                    |
| <b>Incubation Buffer:</b>    | 50 mM Tris-HCl, pH 7.4, 0.1% BSA, 0.5 mM CaCl <sub>2</sub> , 0.05% Tween-20 | <b>Quantiation Method:</b>    | Radioligand Binding                      |
| <b>Kd:</b>                   | 0.048 nM *                                                                  | <b>Significance Criteria:</b> | ≥50% of max stimulation or inhibition    |
|                              |                                                                             | <b>Bmax:</b>                  | 0.35 pmole/mg Protein *                  |

**■ 224110** Endothelin ET<sub>B</sub>

---

|                              |                                                                                 |                               |                                         |
|------------------------------|---------------------------------------------------------------------------------|-------------------------------|-----------------------------------------|
| <b>Source:</b>               | Human recombinant CHO-K1 cells                                                  | <b>Ligand:</b>                | 0.1 nM [ <sup>125</sup> I] Endothelin-1 |
| <b>Vehicle:</b>              | 1% DMSO                                                                         | <b>Non-Specific Ligand:</b>   | 0.1 μM Endothelin-1                     |
| <b>Incubation Time/Temp:</b> | 2 hours @ 25°C                                                                  | <b>Specific Binding:</b>      | 75% *                                   |
| <b>Incubation Buffer:</b>    | 50 mM HEPES, pH 7.4, 1 mM CaCl <sub>2</sub> , 5 mM MgCl <sub>2</sub> , 0.5% BSA | <b>Quantiation Method:</b>    | Radioligand Binding                     |
| <b>Kd:</b>                   | 0.085 nM *                                                                      | <b>Significance Criteria:</b> | ≥50% of max stimulation or inhibition   |
|                              |                                                                                 | <b>Bmax:</b>                  | 4.3 pmole/mg Protein *                  |

**■ 225510** Epidermal Growth Factor (EGF)

---

|                              |                                                                                                            |                               |                                         |
|------------------------------|------------------------------------------------------------------------------------------------------------|-------------------------------|-----------------------------------------|
| <b>Source:</b>               | Human A431 cells                                                                                           | <b>Ligand:</b>                | 0.08 nM [ <sup>125</sup> I] EGF (human) |
| <b>Vehicle:</b>              | 1% DMSO                                                                                                    | <b>Non-Specific Ligand:</b>   | 0.1 μM EGF (human)                      |
| <b>Incubation Time/Temp:</b> | 60 minutes @ 25°C                                                                                          | <b>Specific Binding:</b>      | 90% *                                   |
| <b>Incubation Buffer:</b>    | 50 mM HEPES, pH 7.7, 0.1% BSA, 1.2 mM CaCl <sub>2</sub> , 5 mM KCl, 1.2 mM MgSO <sub>4</sub> , 138 mM NaCl | <b>Quantiation Method:</b>    | Radioligand Binding                     |
| <b>Kd:</b>                   | 0.17 nM *                                                                                                  | <b>Significance Criteria:</b> | ≥50% of max stimulation or inhibition   |
|                              |                                                                                                            | <b>Bmax:</b>                  | 5.5 pmole/mg Protein *                  |

**■ 226010** Estrogen ER<sub>α</sub>

---

|                              |                                                          |                               |                                       |
|------------------------------|----------------------------------------------------------|-------------------------------|---------------------------------------|
| <b>Source:</b>               | Human recombinant insect Sf9 cells                       | <b>Ligand:</b>                | 0.5 nM [ <sup>3</sup> H] Estradiol    |
| <b>Vehicle:</b>              | 1% DMSO                                                  | <b>Non-Specific Ligand:</b>   | 1 μM Diethylstilbestrol               |
| <b>Incubation Time/Temp:</b> | 2 hours @ 25°C                                           | <b>Specific Binding:</b>      | 85% *                                 |
| <b>Incubation Buffer:</b>    | 10 mM Tris-HCl, pH 7.4, 0.1% BSA, 10% Glycerol, 1 mM DTT | <b>Quantiation Method:</b>    | Radioligand Binding                   |
| <b>Kd:</b>                   | 0.2 nM *                                                 | <b>Significance Criteria:</b> | ≥50% of max stimulation or inhibition |
|                              |                                                          | <b>Bmax:</b>                  | 1400 pmole/mg Protein *               |

\* Historical Values

■ 226600 GABA<sub>A</sub>, Flunitrazepam, Central

---

|                              |                                     |                               |                                       |
|------------------------------|-------------------------------------|-------------------------------|---------------------------------------|
| <b>Source:</b>               | Wistar Rat brain (minus cerebellum) | <b>Ligand:</b>                | 1 nM [ <sup>3</sup> H] Flunitrazepam  |
| <b>Vehicle:</b>              | 1% DMSO                             | <b>Non-Specific Ligand:</b>   | 10 μM Diazepam                        |
| <b>Incubation Time/Temp:</b> | 60 minutes @ 25°C                   | <b>Specific Binding:</b>      | 91% *                                 |
| <b>Incubation Buffer:</b>    | 50 mM Phosphate Buffer, pH 7.4      | <b>Quantiation Method:</b>    | Radioligand Binding                   |
| <b>Kd:</b>                   | 4.4 nM *                            | <b>Significance Criteria:</b> | ≥50% of max stimulation or inhibition |
|                              |                                     | <b>Bmax:</b>                  | 1.2 pmole/mg Protein *                |

■ 226500 GABA<sub>A</sub>, Muscimol, Central

---

|                              |                                     |                               |                                       |
|------------------------------|-------------------------------------|-------------------------------|---------------------------------------|
| <b>Source:</b>               | Wistar Rat brain (minus cerebellum) | <b>Ligand:</b>                | 1 nM [ <sup>3</sup> H] Muscimol       |
| <b>Vehicle:</b>              | 1% DMSO                             | <b>Non-Specific Ligand:</b>   | 0.1 μM Muscimol                       |
| <b>Incubation Time/Temp:</b> | 10 minutes @ 4°C                    | <b>Specific Binding:</b>      | 90% *                                 |
| <b>Incubation Buffer:</b>    | 50 mM Tris-HCl, pH 7.4              | <b>Quantiation Method:</b>    | Radioligand Binding                   |
| <b>Kd:</b>                   | 3.8 nM *                            | <b>Significance Criteria:</b> | ≥50% of max stimulation or inhibition |
|                              |                                     | <b>Bmax:</b>                  | 1.8 pmole/mg Protein *                |

■ 228610 GABA<sub>B1A</sub>

---

|                              |                                                             |                               |                                       |
|------------------------------|-------------------------------------------------------------|-------------------------------|---------------------------------------|
| <b>Source:</b>               | Human recombinant CHO cells                                 | <b>Ligand:</b>                | 4 nM [ <sup>3</sup> H] CGP-54626      |
| <b>Vehicle:</b>              | 1% DMSO                                                     | <b>Non-Specific Ligand:</b>   | 3 mM GABA                             |
| <b>Incubation Time/Temp:</b> | 3 hours @ 25°C                                              | <b>Specific Binding:</b>      | 90% *                                 |
| <b>Incubation Buffer:</b>    | 50 mM Tris-HCl, pH 7.4, 2.5 mM CaCl <sub>2</sub> , 0.1% BSA | <b>Quantiation Method:</b>    | Radioligand Binding                   |
| <b>Kd:</b>                   | 3.3 nM *                                                    | <b>Significance Criteria:</b> | ≥50% of max stimulation or inhibition |
|                              |                                                             | <b>Bmax:</b>                  | 48 pmole/mg Protein *                 |

■ 232030 Glucocorticoid

---

|                              |                                                                                                                                            |                               |                                       |
|------------------------------|--------------------------------------------------------------------------------------------------------------------------------------------|-------------------------------|---------------------------------------|
| <b>Source:</b>               | Human recombinant Insect cells                                                                                                             | <b>Ligand:</b>                | 5 nM [ <sup>3</sup> H] Dexamethasone  |
| <b>Vehicle:</b>              | 1% DMSO                                                                                                                                    | <b>Non-Specific Ligand:</b>   | 10 μM Dexamethasone                   |
| <b>Incubation Time/Temp:</b> | 1 day @ 4°C                                                                                                                                | <b>Specific Binding:</b>      | 97% *                                 |
| <b>Incubation Buffer:</b>    | 5 mM KH <sub>2</sub> PO <sub>4</sub> , 8 mM Na <sub>2</sub> HPO <sub>4</sub> ·12H <sub>2</sub> O, pH7.4, 137 mM NaCl, 2.7 mM KCl, 0.2% BSA | <b>Quantiation Method:</b>    | Radioligand Binding                   |
| <b>Kd:</b>                   | 4.6 nM *                                                                                                                                   | <b>Significance Criteria:</b> | ≥50% of max stimulation or inhibition |
|                              |                                                                                                                                            | <b>Bmax:</b>                  | 1 pmole/mg *                          |

\* Historical Values

---

■ 232700 Glutamate, Kainate

---

|                              |                                     |                               |                                       |
|------------------------------|-------------------------------------|-------------------------------|---------------------------------------|
| <b>Source:</b>               | Wistar Rat brain (minus cerebellum) | <b>Ligand:</b>                | 5 nM [ <sup>3</sup> H] Kainic acid    |
| <b>Vehicle:</b>              | 1% DMSO                             | <b>Non-Specific Ligand:</b>   | 1 mM L-Glutamic acid                  |
| <b>Incubation Time/Temp:</b> | 60 minutes @ 4°C                    | <b>Specific Binding:</b>      | 80% *                                 |
| <b>Incubation Buffer:</b>    | 50 mM Tris-HCl, pH 7.4              | <b>Quantiation Method:</b>    | Radioligand Binding                   |
| <b>Kd:</b>                   | 0.012 μM *                          | <b>Significance Criteria:</b> | ≥50% of max stimulation or inhibition |
|                              |                                     | <b>Bmax:</b>                  | 0.35 pmole/mg Protein *               |

■ 232810 Glutamate, NMDA, Agonism

---

|                              |                            |                               |                                       |
|------------------------------|----------------------------|-------------------------------|---------------------------------------|
| <b>Source:</b>               | Wistar Rat cerebral cortex | <b>Ligand:</b>                | 2 nM [ <sup>3</sup> H] CGP-39653      |
| <b>Vehicle:</b>              | 1% DMSO                    | <b>Non-Specific Ligand:</b>   | 1 mM L-Glutamic acid                  |
| <b>Incubation Time/Temp:</b> | 20 minutes @ 4°C           | <b>Specific Binding:</b>      | 70% *                                 |
| <b>Incubation Buffer:</b>    | 50 mM Tris-HCl, pH 7.4     | <b>Quantiation Method:</b>    | Radioligand Binding                   |
| <b>Kd:</b>                   | 0.019 μM *                 | <b>Significance Criteria:</b> | ≥50% of max stimulation or inhibition |
|                              |                            | <b>Bmax:</b>                  | 2.3 pmole/mg Protein *                |

■ 232910 Glutamate, NMDA, Glycine

---

|                              |                            |                               |                                       |
|------------------------------|----------------------------|-------------------------------|---------------------------------------|
| <b>Source:</b>               | Wistar Rat cerebral cortex | <b>Ligand:</b>                | 0.33 nM [ <sup>3</sup> H] MDL 105,519 |
| <b>Vehicle:</b>              | 1% DMSO                    | <b>Non-Specific Ligand:</b>   | 10 μM MDL 105,519                     |
| <b>Incubation Time/Temp:</b> | 30 minutes @ 4°C           | <b>Specific Binding:</b>      | 85% *                                 |
| <b>Incubation Buffer:</b>    | 50 mM HEPES, pH 7.7        | <b>Quantiation Method:</b>    | Radioligand Binding                   |
| <b>Kd:</b>                   | 6 nM *                     | <b>Significance Criteria:</b> | ≥50% of max stimulation or inhibition |
|                              |                            | <b>Bmax:</b>                  | 3.7 pmole/mg Protein *                |

■ 233000 Glutamate, NMDA, Phencyclidine

---

|                              |                            |                               |                                       |
|------------------------------|----------------------------|-------------------------------|---------------------------------------|
| <b>Source:</b>               | Wistar Rat cerebral cortex | <b>Ligand:</b>                | 4 nM [ <sup>3</sup> H] TCP            |
| <b>Vehicle:</b>              | 1% DMSO                    | <b>Non-Specific Ligand:</b>   | 1 μM Dizocilpine ((+)-MK-801)         |
| <b>Incubation Time/Temp:</b> | 45 minutes @ 25°C          | <b>Specific Binding:</b>      | 94% *                                 |
| <b>Incubation Buffer:</b>    | 10 mM Tris-HCl, pH 7.4     | <b>Quantiation Method:</b>    | Radioligand Binding                   |
| <b>Kd:</b>                   | 8.4 nM *                   | <b>Significance Criteria:</b> | ≥50% of max stimulation or inhibition |
|                              |                            | <b>Bmax:</b>                  | 0.78 pmole/mg Protein *               |

\* Historical Values

---

**■ 239610** Histamine H<sub>1</sub>

---

|                              |                                                                                 |                               |                                       |
|------------------------------|---------------------------------------------------------------------------------|-------------------------------|---------------------------------------|
| <b>Source:</b>               | Human recombinant CHO-K1 cells                                                  | <b>Ligand:</b>                | 1.2 nM [ <sup>3</sup> H] Pyrilamine   |
| <b>Vehicle:</b>              | 1% DMSO                                                                         | <b>Non-Specific Ligand:</b>   | 1 μM Pyrilamine                       |
| <b>Incubation Time/Temp:</b> | 3 hours @ 25°C                                                                  | <b>Specific Binding:</b>      | 94% *                                 |
| <b>Incubation Buffer:</b>    | 50 mM Tris-HCl, pH 7.4, 2 mM MgCl <sub>2</sub> ,<br>100 mM NaCl, 250 mM Sucrose | <b>Quantiation Method:</b>    | Radioligand Binding                   |
| <b>Kd:</b>                   | 1.1 nM *                                                                        | <b>Significance Criteria:</b> | ≥50% of max stimulation or inhibition |
|                              |                                                                                 | <b>Bmax:</b>                  | 6.7 pmole/mg Protein *                |

**■ 239710** Histamine H<sub>2</sub>

---

|                              |                                |                               |                                           |
|------------------------------|--------------------------------|-------------------------------|-------------------------------------------|
| <b>Source:</b>               | Human recombinant CHO-K1 cells | <b>Ligand:</b>                | 0.1 nM [ <sup>125</sup> I] Aminopentidine |
| <b>Vehicle:</b>              | 1% DMSO                        | <b>Non-Specific Ligand:</b>   | 3 μM Tiotidine                            |
| <b>Incubation Time/Temp:</b> | 2 hours @ 25°C                 | <b>Specific Binding:</b>      | 90% *                                     |
| <b>Incubation Buffer:</b>    | 50 mM Phosphate, pH 7.4        | <b>Quantiation Method:</b>    | Radioligand Binding                       |
| <b>Kd:</b>                   | 0.45 nM *                      | <b>Significance Criteria:</b> | ≥50% of max stimulation or inhibition     |
|                              |                                | <b>Bmax:</b>                  | 6.9 pmole/mg Protein *                    |

**■ 239820** Histamine H<sub>3</sub>

---

|                              |                                                              |                               |                                                     |
|------------------------------|--------------------------------------------------------------|-------------------------------|-----------------------------------------------------|
| <b>Source:</b>               | Human recombinant CHO-K1 cells                               | <b>Ligand:</b>                | 0.4 nM [ <sup>3</sup> H] N-α-Methylhistamine (NAMH) |
| <b>Vehicle:</b>              | 1% DMSO                                                      | <b>Non-Specific Ligand:</b>   | 1 μM R(-)-α-Methylhistamine (RAMH)                  |
| <b>Incubation Time/Temp:</b> | 2 hours @ 25°C                                               | <b>Specific Binding:</b>      | 90% *                                               |
| <b>Incubation Buffer:</b>    | 50 mM Tris-HCl, pH 7.4, 5 mM MgCl <sub>2</sub> ,<br>0.1% BSA | <b>Quantiation Method:</b>    | Radioligand Binding                                 |
| <b>Kd:</b>                   | 0.38 nM *                                                    | <b>Significance Criteria:</b> | ≥50% of max stimulation or inhibition               |
|                              |                                                              | <b>Bmax:</b>                  | 2 pmole/mg Protein *                                |

**■ 241000** Imidazoline I<sub>2</sub>, Central

---

|                              |                                        |                               |                                       |
|------------------------------|----------------------------------------|-------------------------------|---------------------------------------|
| <b>Source:</b>               | Wistar Rat cerebral cortex             | <b>Ligand:</b>                | 2 nM [ <sup>3</sup> H] Idazoxan       |
| <b>Vehicle:</b>              | 1% DMSO                                | <b>Non-Specific Ligand:</b>   | 1 μM Idazoxan                         |
| <b>Incubation Time/Temp:</b> | 30 minutes @ 25°C                      | <b>Specific Binding:</b>      | 85% *                                 |
| <b>Incubation Buffer:</b>    | 50 mM Tris-HCl, pH 7.4, 0.5 mM<br>EDTA | <b>Quantiation Method:</b>    | Radioligand Binding                   |
| <b>Kd:</b>                   | 4 nM *                                 | <b>Significance Criteria:</b> | ≥50% of max stimulation or inhibition |
|                              |                                        | <b>Bmax:</b>                  | 0.14 pmole/mg Protein *               |

\* Historical Values

■ 243520 Interleukin IL-1

|                              |                                                           |                               |                                           |
|------------------------------|-----------------------------------------------------------|-------------------------------|-------------------------------------------|
| <b>Source:</b>               | Mouse 3T3-SWISS cells                                     | <b>Ligand:</b>                | 0.1 nM [ <sup>125</sup> I] Interleukin-1β |
| <b>Vehicle:</b>              | 1% DMSO                                                   | <b>Non-Specific Ligand:</b>   | 10 μM Interleukin-1β                      |
| <b>Incubation Time/Temp:</b> | 2 hours @ 37°C                                            | <b>Specific Binding:</b>      | 80% *                                     |
| <b>Incubation Buffer:</b>    | RPMI 1640, 20 mM HEPES, pH 7.4, 0.1% Sodium Azide, 1% BSA | <b>Quantiation Method:</b>    | Radioligand Binding                       |
| <b>Kd:</b>                   | 0.25 nM *                                                 | <b>Significance Criteria:</b> | ≥50% of max stimulation or inhibition     |
|                              |                                                           | <b>Bmax:</b>                  | 820 R/cell Protein *                      |

■ 250460 Leukotriene, Cysteinyl CysLT<sub>1</sub>

|                              |                                                                                                                               |                               |                                           |
|------------------------------|-------------------------------------------------------------------------------------------------------------------------------|-------------------------------|-------------------------------------------|
| <b>Source:</b>               | Human recombinant CHO-K1 cells                                                                                                | <b>Ligand:</b>                | 0.3 nM [ <sup>3</sup> H] LTD <sub>4</sub> |
| <b>Vehicle:</b>              | 1% DMSO                                                                                                                       | <b>Non-Specific Ligand:</b>   | 0.3 μM LTD <sub>4</sub>                   |
| <b>Incubation Time/Temp:</b> | 30 minutes @ 25°C                                                                                                             | <b>Specific Binding:</b>      | 93% *                                     |
| <b>Incubation Buffer:</b>    | 50 mM Tris-HCl, pH 7.4, 5 mM CaCl <sub>2</sub> , 5 mM MgCl <sub>2</sub> , 100 μg/ml Bacitracin, 1 mM Benzamidine, 0.1 mM PMSF | <b>Quantiation Method:</b>    | Radioligand Binding                       |
| <b>Kd:</b>                   | 0.21 nM *                                                                                                                     | <b>Significance Criteria:</b> | ≥50% of max stimulation or inhibition     |
|                              |                                                                                                                               | <b>Bmax:</b>                  | 3 pmole/mg Protein *                      |

■ 251600 Melatonin MT<sub>1</sub>

|                              |                                                                                 |                               |                                             |
|------------------------------|---------------------------------------------------------------------------------|-------------------------------|---------------------------------------------|
| <b>Source:</b>               | Human recombinant CHO-K1 cells                                                  | <b>Ligand:</b>                | 0.05 nM [ <sup>125</sup> I] 2-Iodometatonin |
| <b>Vehicle:</b>              | 1% DMSO                                                                         | <b>Non-Specific Ligand:</b>   | 1 μM 6-Chlorometatonin                      |
| <b>Incubation Time/Temp:</b> | 3 hours @ 25°C                                                                  | <b>Specific Binding:</b>      | 97% *                                       |
| <b>Incubation Buffer:</b>    | 25 mM HEPES, pH 7.4, 5 mM MgCl <sub>2</sub> , 1 mM CaCl <sub>2</sub> , 0.5% BSA | <b>Quantiation Method:</b>    | Radioligand Binding                         |
| <b>Kd:</b>                   | 0.054 nM *                                                                      | <b>Significance Criteria:</b> | ≥50% of max stimulation or inhibition       |
|                              |                                                                                 | <b>Bmax:</b>                  | 3.5 pmole/mg Protein *                      |

■ 252610 Muscarinic M<sub>1</sub>

|                              |                                                             |                               |                                              |
|------------------------------|-------------------------------------------------------------|-------------------------------|----------------------------------------------|
| <b>Source:</b>               | Human recombinant CHO-K1 cells                              | <b>Ligand:</b>                | 0.8 nM [ <sup>3</sup> H] N-Methylscopolamine |
| <b>Vehicle:</b>              | 1% DMSO                                                     | <b>Non-Specific Ligand:</b>   | 1 μM Atropine                                |
| <b>Incubation Time/Temp:</b> | 2 hours @ 25°C                                              | <b>Specific Binding:</b>      | 95% *                                        |
| <b>Incubation Buffer:</b>    | 50 mM Tris-HCl, pH 7.4, 10 mM MgCl <sub>2</sub> , 1 mM EDTA | <b>Quantiation Method:</b>    | Radioligand Binding                          |
| <b>Kd:</b>                   | 0.26 nM *                                                   | <b>Significance Criteria:</b> | ≥50% of max stimulation or inhibition        |
|                              |                                                             | <b>Bmax:</b>                  | 2 pmole/mg Protein *                         |

\* Historical Values

**■ 252710 Muscarinic M<sub>2</sub>**

---

|                              |                                                             |                               |                                              |
|------------------------------|-------------------------------------------------------------|-------------------------------|----------------------------------------------|
| <b>Source:</b>               | Human recombinant CHO-K1 cells                              | <b>Ligand:</b>                | 0.8 nM [ <sup>3</sup> H] N-Methylscopolamine |
| <b>Vehicle:</b>              | 1% DMSO                                                     | <b>Non-Specific Ligand:</b>   | 1 μM Atropine                                |
| <b>Incubation Time/Temp:</b> | 2 hours @ 25°C                                              | <b>Specific Binding:</b>      | 95% *                                        |
| <b>Incubation Buffer:</b>    | 50 mM Tris-HCl, pH 7.4, 10 mM MgCl <sub>2</sub> , 1 mM EDTA | <b>Quantiation Method:</b>    | Radioligand Binding                          |
| <b>Kd:</b>                   | 0.58 nM *                                                   | <b>Significance Criteria:</b> | ≥50% of max stimulation or inhibition        |
|                              |                                                             | <b>Bmax:</b>                  | 5.1 pmole/mg Protein *                       |

**■ 252810 Muscarinic M<sub>3</sub>**

---

|                              |                                                             |                               |                                              |
|------------------------------|-------------------------------------------------------------|-------------------------------|----------------------------------------------|
| <b>Source:</b>               | Human recombinant CHO-K1 cells                              | <b>Ligand:</b>                | 0.8 nM [ <sup>3</sup> H] N-Methylscopolamine |
| <b>Vehicle:</b>              | 1% DMSO                                                     | <b>Non-Specific Ligand:</b>   | 1 μM Atropine                                |
| <b>Incubation Time/Temp:</b> | 2 hours @ 25°C                                              | <b>Specific Binding:</b>      | 95% *                                        |
| <b>Incubation Buffer:</b>    | 50 mM Tris-HCl, pH 7.4, 10 mM MgCl <sub>2</sub> , 1 mM EDTA | <b>Quantiation Method:</b>    | Radioligand Binding                          |
| <b>Kd:</b>                   | 0.75 nM *                                                   | <b>Significance Criteria:</b> | ≥50% of max stimulation or inhibition        |
|                              |                                                             | <b>Bmax:</b>                  | 5.4 pmole/mg Protein *                       |

**■ 257010 Neuropeptide Y Y<sub>1</sub>**

---

|                              |                                                                                                     |                               |                                         |
|------------------------------|-----------------------------------------------------------------------------------------------------|-------------------------------|-----------------------------------------|
| <b>Source:</b>               | Human SK-N-MC cells                                                                                 | <b>Ligand:</b>                | 0.015 nM [ <sup>125</sup> I] Peptide YY |
| <b>Vehicle:</b>              | 1% DMSO                                                                                             | <b>Non-Specific Ligand:</b>   | 1 μM Neuropeptide Y (human, rat)        |
| <b>Incubation Time/Temp:</b> | 60 minutes @ 37°C                                                                                   | <b>Specific Binding:</b>      | 80% *                                   |
| <b>Incubation Buffer:</b>    | 25 mM HEPES, pH 7.4, 1 mM MgCl <sub>2</sub> , 2.5 mM CaCl <sub>2</sub> , 0.1% BSA, 0.01% Bacitracin | <b>Quantiation Method:</b>    | Radioligand Binding                     |
| <b>Kd:</b>                   | 0.24 nM *                                                                                           | <b>Significance Criteria:</b> | ≥50% of max stimulation or inhibition   |
|                              |                                                                                                     | <b>Bmax:</b>                  | 0.58 pmole/mg protein *                 |

**■ 257110 Neuropeptide Y Y<sub>2</sub>**

---

|                              |                                                                                          |                               |                                       |
|------------------------------|------------------------------------------------------------------------------------------|-------------------------------|---------------------------------------|
| <b>Source:</b>               | Human KAN-TS cells                                                                       | <b>Ligand:</b>                | 10 pM [ <sup>125</sup> I] Peptide YY  |
| <b>Vehicle:</b>              | 1% DMSO                                                                                  | <b>Non-Specific Ligand:</b>   | 1 μM Neuropeptide Y (13-36) (porcine) |
| <b>Incubation Time/Temp:</b> | 2 hours @ 37°C                                                                           | <b>Specific Binding:</b>      | 90% *                                 |
| <b>Incubation Buffer:</b>    | 25 mM HEPES, pH 7.4, 2.5 mM CaCl <sub>2</sub> , 1 mM MgCl <sub>2</sub> , 0.1% Bacitracin | <b>Quantiation Method:</b>    | Radioligand Binding                   |
| <b>Kd:</b>                   | 0.012 nM *                                                                               | <b>Significance Criteria:</b> | ≥50% of max stimulation or inhibition |
|                              |                                                                                          | <b>Bmax:</b>                  | 0.5 pmole/mg Protein *                |

---

\* Historical Values

**■ 258590** Nicotinic Acetylcholine

---

|                              |                                                                                                 |                               |                                        |
|------------------------------|-------------------------------------------------------------------------------------------------|-------------------------------|----------------------------------------|
| <b>Source:</b>               | Human IMR-32 cells                                                                              | <b>Ligand:</b>                | 0.1 nM [ <sup>125</sup> I] Epibatidine |
| <b>Vehicle:</b>              | 1% DMSO                                                                                         | <b>Non-Specific Ligand:</b>   | 300 μM (-)-Nicotine                    |
| <b>Incubation Time/Temp:</b> | 60 minutes @ 25°C                                                                               | <b>Specific Binding:</b>      | 97% *                                  |
| <b>Incubation Buffer:</b>    | 20 mM HEPES, pH 7.5, 150 mM NaCl, 1.5 mM KCl, 2 mM CaCl <sub>2</sub> , 1 mM MgSO <sub>4</sub> . | <b>Quantiation Method:</b>    | Radioligand Binding                    |
| <b>Kd:</b>                   | 0.22 nM *                                                                                       | <b>Significance Criteria:</b> | ≥50% of max stimulation or inhibition  |
|                              |                                                                                                 | <b>Bmax:</b>                  | 0.46 pmole/mg Protein *                |

**■ 258700** Nicotinic Acetylcholine α, Bungarotoxin

---

|                              |                                                 |                               |                                           |
|------------------------------|-------------------------------------------------|-------------------------------|-------------------------------------------|
| <b>Source:</b>               | Human RD cells                                  | <b>Ligand:</b>                | 0.6 nM [ <sup>125</sup> I] α-Bungarotoxin |
| <b>Vehicle:</b>              | 1% DMSO                                         | <b>Non-Specific Ligand:</b>   | 1 μM α-Bungarotoxin                       |
| <b>Incubation Time/Temp:</b> | 2 hours @ 25°C                                  | <b>Specific Binding:</b>      | 85% *                                     |
| <b>Incubation Buffer:</b>    | 150 mM NaCl, 4 mM KCl, 2.3 mM CaCl <sub>2</sub> | <b>Quantiation Method:</b>    | Radioligand Binding                       |
| <b>Kd:</b>                   | 1.1 nM *                                        | <b>Significance Criteria:</b> | ≥50% of max stimulation or inhibition     |
|                              |                                                 | <b>Bmax:</b>                  | 1 pmole/mg Protein *                      |

**■ 260130** Opiate δ<sub>1</sub> (OP1, DOP)

---

|                              |                                                            |                               |                                       |
|------------------------------|------------------------------------------------------------|-------------------------------|---------------------------------------|
| <b>Source:</b>               | Human recombinant HEK-293 cells                            | <b>Ligand:</b>                | 1.3 nM [ <sup>3</sup> H] Naltrindole  |
| <b>Vehicle:</b>              | 1% DMSO                                                    | <b>Non-Specific Ligand:</b>   | 1 μM Naltrindole                      |
| <b>Incubation Time/Temp:</b> | 60 minutes @ 25°C                                          | <b>Specific Binding:</b>      | 95% *                                 |
| <b>Incubation Buffer:</b>    | 50 mM Tris-HCl, pH 7.4, 1 mM EDTA, 10 mM MgCl <sub>2</sub> | <b>Quantiation Method:</b>    | Radioligand Binding                   |
| <b>Kd:</b>                   | 0.27 nM *                                                  | <b>Significance Criteria:</b> | ≥50% of max stimulation or inhibition |
|                              |                                                            | <b>Bmax:</b>                  | 7.6 pmole/mg Protein *                |

**■ 260210** Opiate κ(OP2, KOP)

---

|                              |                                 |                               |                                        |
|------------------------------|---------------------------------|-------------------------------|----------------------------------------|
| <b>Source:</b>               | Human recombinant HEK-293 cells | <b>Ligand:</b>                | 0.6 nM [ <sup>3</sup> H] Diprenorphine |
| <b>Vehicle:</b>              | 1% DMSO                         | <b>Non-Specific Ligand:</b>   | 10 μM Naloxone                         |
| <b>Incubation Time/Temp:</b> | 60 minutes @ 25°C               | <b>Specific Binding:</b>      | 90% *                                  |
| <b>Incubation Buffer:</b>    | 50 mM Tris-HCl, pH 7.4          | <b>Quantiation Method:</b>    | Radioligand Binding                    |
| <b>Kd:</b>                   | 0.4 nM *                        | <b>Significance Criteria:</b> | ≥50% of max stimulation or inhibition  |
|                              |                                 | <b>Bmax:</b>                  | 1.1 pmole/mg Protein *                 |

\* Historical Values



■ 260410 Opiate  $\mu$ (OP3, MOP)

---

|                              |                                |                               |                                             |
|------------------------------|--------------------------------|-------------------------------|---------------------------------------------|
| <b>Source:</b>               | Human recombinant CHO-K1 cells | <b>Ligand:</b>                | 0.6 nM [ <sup>3</sup> H] Diprenorphine      |
| <b>Vehicle:</b>              | 1% DMSO                        | <b>Non-Specific Ligand:</b>   | 10 $\mu$ M Naloxone                         |
| <b>Incubation Time/Temp:</b> | 60 minutes @ 25°C              | <b>Specific Binding:</b>      | 90% *                                       |
| <b>Incubation Buffer:</b>    | 50 mM Tris-HCl, pH 7.4         | <b>Quantiation Method:</b>    | Radioligand Binding                         |
| <b>Kd:</b>                   | 0.41 nM *                      | <b>Significance Criteria:</b> | $\geq$ 50% of max stimulation or inhibition |
|                              |                                | <b>Bmax:</b>                  | 3.8 pmole/mg Protein *                      |

■ 264500 Phorbol Ester

---

|                              |                                                |                               |                                             |
|------------------------------|------------------------------------------------|-------------------------------|---------------------------------------------|
| <b>Source:</b>               | ICR Mouse brain                                | <b>Ligand:</b>                | 3 nM [ <sup>3</sup> H] PDBu                 |
| <b>Vehicle:</b>              | 1% DMSO                                        | <b>Non-Specific Ligand:</b>   | 1 $\mu$ M PDBu                              |
| <b>Incubation Time/Temp:</b> | 60 minutes @ 25°C                              | <b>Specific Binding:</b>      | 80% *                                       |
| <b>Incubation Buffer:</b>    | 20 mM Tris-HCl, pH 7.4, 5 mM CaCl <sub>2</sub> | <b>Quantiation Method:</b>    | Radioligand Binding                         |
| <b>Kd:</b>                   | 8.7 nM *                                       | <b>Significance Criteria:</b> | $\geq$ 50% of max stimulation or inhibition |
|                              |                                                | <b>Bmax:</b>                  | 26 pmole/mg Protein *                       |

■ 265010 Platelet Activating Factor (PAF)

---

|                              |                                                                                   |                               |                                             |
|------------------------------|-----------------------------------------------------------------------------------|-------------------------------|---------------------------------------------|
| <b>Source:</b>               | Human platelets                                                                   | <b>Ligand:</b>                | 0.12 nM [ <sup>3</sup> H] PAF               |
| <b>Vehicle:</b>              | 1% DMSO                                                                           | <b>Non-Specific Ligand:</b>   | 1 $\mu$ M PAF                               |
| <b>Incubation Time/Temp:</b> | 3 hours @ 25°C                                                                    | <b>Specific Binding:</b>      | 90% *                                       |
| <b>Incubation Buffer:</b>    | 50 mM Tris-HCl, pH 7.4, 100 mM KCl, 5 mM EDTA, 5 mM MgCl <sub>2</sub> , 0.25% BSA | <b>Quantiation Method:</b>    | Radioligand Binding                         |
| <b>Kd:</b>                   | 0.13 nM *                                                                         | <b>Significance Criteria:</b> | $\geq$ 50% of max stimulation or inhibition |
|                              |                                                                                   | <b>Bmax:</b>                  | 120 R/cell *                                |

■ 265600 Potassium Channel [K<sub>ATP</sub>]

---

|                              |                                              |                               |                                             |
|------------------------------|----------------------------------------------|-------------------------------|---------------------------------------------|
| <b>Source:</b>               | Hamster pancreatic HIT-T15 beta cells        | <b>Ligand:</b>                | 5 nM [ <sup>3</sup> H] Glyburide            |
| <b>Vehicle:</b>              | 1% DMSO                                      | <b>Non-Specific Ligand:</b>   | 1 $\mu$ M Glyburide                         |
| <b>Incubation Time/Temp:</b> | 2 hours @ 25°C                               | <b>Specific Binding:</b>      | 90% *                                       |
| <b>Incubation Buffer:</b>    | 50 mM MOPS, pH 7.4, 0.1 mM CaCl <sub>2</sub> | <b>Quantiation Method:</b>    | Radioligand Binding                         |
| <b>Kd:</b>                   | 0.64 nM *                                    | <b>Significance Criteria:</b> | $\geq$ 50% of max stimulation or inhibition |
|                              |                                              | <b>Bmax:</b>                  | 1 pmole/mg Protein *                        |

\* Historical Values

---

**■ 265900** Potassium Channel hERG

---

|                              |                                                                                                           |                               |                                       |
|------------------------------|-----------------------------------------------------------------------------------------------------------|-------------------------------|---------------------------------------|
| <b>Source:</b>               | Human recombinant HEK-293 cells                                                                           | <b>Ligand:</b>                | 1.5 nM [ <sup>3</sup> H] Astemizole   |
| <b>Vehicle:</b>              | 1% DMSO                                                                                                   | <b>Non-Specific Ligand:</b>   | 10 µM Astemizole                      |
| <b>Incubation Time/Temp:</b> | 60 minutes @ 25°C                                                                                         | <b>Specific Binding:</b>      | 90% *                                 |
| <b>Incubation Buffer:</b>    | 10 mM HEPES, pH 7.4, 0.1% BSA, 5 mM KCl, 0.8 mM MgCl <sub>2</sub> , 130 mM NaCl, 1 mM EGTA, 10 mM Glucose | <b>Quantiation Method:</b>    | Radioligand Binding                   |
| <b>Kd:</b>                   | 6.8 nM *                                                                                                  | <b>Significance Criteria:</b> | ≥50% of max stimulation or inhibition |
|                              |                                                                                                           | <b>Bmax:</b>                  | 6.3 pmole/mg Protein *                |

**■ 268420** Prostanoid EP<sub>4</sub>

---

|                              |                                                       |                               |                                                                         |
|------------------------------|-------------------------------------------------------|-------------------------------|-------------------------------------------------------------------------|
| <b>Source:</b>               | Human recombinant Chem-1 cells                        | <b>Ligand:</b>                | 1 nM [ <sup>3</sup> H] Prostaglandin E <sub>2</sub> (PGE <sub>2</sub> ) |
| <b>Vehicle:</b>              | 1% DMSO                                               | <b>Non-Specific Ligand:</b>   | 10 µM Prostaglandin E <sub>2</sub> (PGE <sub>2</sub> )                  |
| <b>Incubation Time/Temp:</b> | 2 hours @ 25°C                                        | <b>Specific Binding:</b>      | 90% *                                                                   |
| <b>Incubation Buffer:</b>    | 10 mM MES, pH 6.0, 1 mM EDTA, 10 mM MgCl <sub>2</sub> | <b>Quantiation Method:</b>    | Radioligand Binding                                                     |
| <b>Kd:</b>                   | 0.69 nM *                                             | <b>Significance Criteria:</b> | ≥50% of max stimulation or inhibition                                   |
|                              |                                                       | <b>Bmax:</b>                  | 4.3 pmole/mg Protein *                                                  |

**■ 268700** Purinergic P<sub>2x</sub>

---

|                              |                                                   |                               |                                           |
|------------------------------|---------------------------------------------------|-------------------------------|-------------------------------------------|
| <b>Source:</b>               | New Zealand derived albino Rabbit urinary bladder | <b>Ligand:</b>                | 8 nM [ <sup>3</sup> H] α, β-Methylene-ATP |
| <b>Vehicle:</b>              | 1% DMSO                                           | <b>Non-Specific Ligand:</b>   | 100 µM β, γ-Methylene ATP                 |
| <b>Incubation Time/Temp:</b> | 30 minutes @ 25°C                                 | <b>Specific Binding:</b>      | 80% *                                     |
| <b>Incubation Buffer:</b>    | 50 mM Tris-HCl, pH 7.4                            | <b>Quantiation Method:</b>    | Radioligand Binding                       |
| <b>Kd1:</b>                  | 2.2 nM *                                          | <b>Significance Criteria:</b> | ≥50% of max stimulation or inhibition     |
| <b>Kd2:</b>                  | 2.2 µM *                                          | <b>Bmax1:</b>                 | 2 pmole/mg Protein *                      |
|                              |                                                   | <b>Bmax2:</b>                 | 790 pmole/mg Protein *                    |

**■ 268810** Purinergic P<sub>2γ</sub>

---

|                              |                        |                               |                                       |
|------------------------------|------------------------|-------------------------------|---------------------------------------|
| <b>Source:</b>               | Wistar Rat brain       | <b>Ligand:</b>                | 0.1 nM [ <sup>35</sup> S] ATP-αS      |
| <b>Vehicle:</b>              | 1% DMSO                | <b>Non-Specific Ligand:</b>   | 10 µM ADP-βS                          |
| <b>Incubation Time/Temp:</b> | 60 minutes @ 25°C      | <b>Specific Binding:</b>      | 87% *                                 |
| <b>Incubation Buffer:</b>    | 50 mM Tris-HCl, pH 7.4 | <b>Quantiation Method:</b>    | Radioligand Binding                   |
| <b>Kd:</b>                   | 0.015 µM *             | <b>Significance Criteria:</b> | ≥50% of max stimulation or inhibition |
|                              |                        | <b>Bmax:</b>                  | 16 pmole/mg Protein *                 |

\* Historical Values

**■ 270000 Rolipram**

---

|                              |                        |                               |                                       |
|------------------------------|------------------------|-------------------------------|---------------------------------------|
| <b>Source:</b>               | Wistar Rat brain       | <b>Ligand:</b>                | 1.8 nM [ <sup>3</sup> H] Rolipram     |
| <b>Vehicle:</b>              | 1% DMSO                | <b>Non-Specific Ligand:</b>   | 10 µM Rolipram                        |
| <b>Incubation Time/Temp:</b> | 60 minutes @ 4°C       | <b>Specific Binding:</b>      | 90% *                                 |
| <b>Incubation Buffer:</b>    | 50 mM Tris-HCl, pH 7.4 | <b>Quantiation Method:</b>    | Radioligand Binding                   |
| <b>Kd:</b>                   | 1 nM *                 | <b>Significance Criteria:</b> | ≥50% of max stimulation or inhibition |
|                              |                        | <b>Bmax:</b>                  | 0.31 pmole/mg Protein *               |

**■ 271110 Serotonin (5-Hydroxytryptamine) 5-HT<sub>1A</sub>**

---

|                              |                                                                                  |                               |                                       |
|------------------------------|----------------------------------------------------------------------------------|-------------------------------|---------------------------------------|
| <b>Source:</b>               | Human recombinant CHO-K1 cells                                                   | <b>Ligand:</b>                | 1.5 nM [ <sup>3</sup> H] 8-OH-DPAT    |
| <b>Vehicle:</b>              | 1% DMSO                                                                          | <b>Non-Specific Ligand:</b>   | 10 µM Metergoline                     |
| <b>Incubation Time/Temp:</b> | 60 minutes @ 25°C                                                                | <b>Specific Binding:</b>      | 75% *                                 |
| <b>Incubation Buffer:</b>    | 50 mM Tris-HCl, pH 7.4, 0.1% Ascorbic Acid, 0.5 mM EDTA, 10 mM MgSO <sub>4</sub> | <b>Quantiation Method:</b>    | Radioligand Binding                   |
| <b>Kd:</b>                   | 2 nM *                                                                           | <b>Significance Criteria:</b> | ≥50% of max stimulation or inhibition |
|                              |                                                                                  | <b>Bmax:</b>                  | 1.3 pmole/mg Protein *                |

**■ 271700 Serotonin (5-Hydroxytryptamine) 5-HT<sub>2B</sub>**

---

|                              |                                                                     |                               |                                                           |
|------------------------------|---------------------------------------------------------------------|-------------------------------|-----------------------------------------------------------|
| <b>Source:</b>               | Human recombinant CHO-K1 cells                                      | <b>Ligand:</b>                | 1.2 nM [ <sup>3</sup> H] Lysergic acid diethylamide (LSD) |
| <b>Vehicle:</b>              | 1% DMSO                                                             | <b>Non-Specific Ligand:</b>   | 10 µM Serotonin (5-HT)                                    |
| <b>Incubation Time/Temp:</b> | 60 minutes @ 37°C                                                   | <b>Specific Binding:</b>      | 80% *                                                     |
| <b>Incubation Buffer:</b>    | 50 mM Tris-HCl, pH 7.4, 4 mM CaCl <sub>2</sub> , 0.1% Ascorbic Acid | <b>Quantiation Method:</b>    | Radioligand Binding                                       |
| <b>Kd:</b>                   | 2.1 nM *                                                            | <b>Significance Criteria:</b> | ≥50% of max stimulation or inhibition                     |
|                              |                                                                     | <b>Bmax:</b>                  | 1.1 pmole/mg Protein *                                    |

**■ 271910 Serotonin (5-Hydroxytryptamine) 5-HT<sub>3</sub>**

---

|                              |                                                           |                               |                                       |
|------------------------------|-----------------------------------------------------------|-------------------------------|---------------------------------------|
| <b>Source:</b>               | Human recombinant HEK-293 cells                           | <b>Ligand:</b>                | 0.69 nM [ <sup>3</sup> H] GR-65630    |
| <b>Vehicle:</b>              | 1% DMSO                                                   | <b>Non-Specific Ligand:</b>   | 10 µM MDL 72222                       |
| <b>Incubation Time/Temp:</b> | 60 minutes @ 25°C                                         | <b>Specific Binding:</b>      | 90% *                                 |
| <b>Incubation Buffer:</b>    | 50 mM Tris-HCl, pH 7.4, 1 mM EDTA, 5 mM MgCl <sub>2</sub> | <b>Quantiation Method:</b>    | Radioligand Binding                   |
| <b>Kd:</b>                   | 0.2 nM *                                                  | <b>Significance Criteria:</b> | ≥50% of max stimulation or inhibition |
|                              |                                                           | <b>Bmax:</b>                  | 11 pmole/mg Protein *                 |

---

\* Historical Values

**■ 278110** Sigma  $\sigma_1$ 

---

|                              |                                  |                               |                                             |
|------------------------------|----------------------------------|-------------------------------|---------------------------------------------|
| <b>Source:</b>               | Human Jurkat cells               | <b>Ligand:</b>                | 8 nM [ <sup>3</sup> H] Haloperidol          |
| <b>Vehicle:</b>              | 1% DMSO                          | <b>Non-Specific Ligand:</b>   | 10 $\mu$ M Haloperidol                      |
| <b>Incubation Time/Temp:</b> | 4 hours @ 25°C                   | <b>Specific Binding:</b>      | 80% *                                       |
| <b>Incubation Buffer:</b>    | 5 mM Potassium Phosphate, pH 7.5 | <b>Quantiation Method:</b>    | Radioligand Binding                         |
| <b>Kd:</b>                   | 5.8 nM *                         | <b>Significance Criteria:</b> | $\geq$ 50% of max stimulation or inhibition |
|                              |                                  | <b>Bmax:</b>                  | 0.71 pmole/mg Protein *                     |

**■ 255520** Tachykinin NK<sub>1</sub>

---

|                              |                                                           |                               |                                             |
|------------------------------|-----------------------------------------------------------|-------------------------------|---------------------------------------------|
| <b>Source:</b>               | Human recombinant CHO cells                               | <b>Ligand:</b>                | 0.8 nM [ <sup>3</sup> H] Substance P        |
| <b>Vehicle:</b>              | 1% DMSO                                                   | <b>Non-Specific Ligand:</b>   | 10 $\mu$ M L-703,606                        |
| <b>Incubation Time/Temp:</b> | 90 minutes @ 4°C                                          | <b>Specific Binding:</b>      | 90% *                                       |
| <b>Incubation Buffer:</b>    | 20 mM HEPES, pH 7.4, 1 mM MnCl <sub>2</sub> ,<br>0.1% BSA | <b>Quantiation Method:</b>    | Radioligand Binding                         |
| <b>Kd:</b>                   | 2.1 nM *                                                  | <b>Significance Criteria:</b> | $\geq$ 50% of max stimulation or inhibition |
|                              |                                                           | <b>Bmax:</b>                  | 1.7 pmole/mg Protein *                      |

**■ 285900** Thyroid Hormone

---

|                              |                                                                             |                               |                                              |
|------------------------------|-----------------------------------------------------------------------------|-------------------------------|----------------------------------------------|
| <b>Source:</b>               | Wistar Rat liver                                                            | <b>Ligand:</b>                | 0.03 nM [ <sup>125</sup> I] Triiodothyronine |
| <b>Vehicle:</b>              | 1% DMSO                                                                     | <b>Non-Specific Ligand:</b>   | 1 $\mu$ M Triiodothyronine                   |
| <b>Incubation Time/Temp:</b> | 18 hours @ 4°C                                                              | <b>Specific Binding:</b>      | 77% *                                        |
| <b>Incubation Buffer:</b>    | 20 mM Tris-HCl, pH 7.6, 50 mM NaCl,<br>10% Glycerol, 2 mM EDTA, 5 mM<br>DTT | <b>Quantiation Method:</b>    | Radioligand Binding                          |
| <b>Kd:</b>                   | 0.034 nM *                                                                  | <b>Significance Criteria:</b> | $\geq$ 50% of max stimulation or inhibition  |
|                              |                                                                             | <b>Bmax:</b>                  | 0.16 pmole/mg Protein *                      |

**■ 220320** Transporter, Dopamine (DAT)

---

|                              |                                                                              |                               |                                             |
|------------------------------|------------------------------------------------------------------------------|-------------------------------|---------------------------------------------|
| <b>Source:</b>               | Human recombinant CHO-K1 cells                                               | <b>Ligand:</b>                | 0.15 nM [ <sup>125</sup> I] RTI-55          |
| <b>Vehicle:</b>              | 1% DMSO                                                                      | <b>Non-Specific Ligand:</b>   | 10 $\mu$ M Nomifensine                      |
| <b>Incubation Time/Temp:</b> | 3 hours @ 4°C                                                                | <b>Specific Binding:</b>      | 90% *                                       |
| <b>Incubation Buffer:</b>    | 50 mM Tris-HCl, pH 7.4, 100 mM<br>NaCl, 1 $\mu$ M Leupeptin, 10 $\mu$ M PMSF | <b>Quantiation Method:</b>    | Radioligand Binding                         |
| <b>Kd:</b>                   | 0.58 nM *                                                                    | <b>Significance Criteria:</b> | $\geq$ 50% of max stimulation or inhibition |
|                              |                                                                              | <b>Bmax:</b>                  | 0.047 pmole/mg Protein *                    |

\* Historical Values

■ **226400** Transporter, GABA

---

|                              |                                                                                                                      |                               |                                       |
|------------------------------|----------------------------------------------------------------------------------------------------------------------|-------------------------------|---------------------------------------|
| <b>Source:</b>               | Wistar Rat cerebral cortex                                                                                           | <b>Ligand:</b>                | 6 nM [ <sup>3</sup> H] GABA           |
| <b>Vehicle:</b>              | 1% DMSO                                                                                                              | <b>Non-Specific Ligand:</b>   | 10 μM NO-711                          |
| <b>Incubation Time/Temp:</b> | 20 minutes @ 25°C                                                                                                    | <b>Specific Binding:</b>      | 80% *                                 |
| <b>Incubation Buffer:</b>    | 10 mM HEPES, pH 7.5, 120 mM NaCl, 4 mM Ca(CH <sub>3</sub> COO) <sub>2</sub> , 10 μM Isoguvacine, 10 μM S(-)-Baclofen | <b>Quantiation Method:</b>    | Radioligand Binding                   |
| <b>Kd:</b>                   | 0.3 μM *                                                                                                             | <b>Significance Criteria:</b> | ≥50% of max stimulation or inhibition |
|                              |                                                                                                                      | <b>Bmax:</b>                  | 60 pmole/mg Protein *                 |

■ **204410** Transporter, Norepinephrine (NET)

---

|                              |                                                                 |                               |                                       |
|------------------------------|-----------------------------------------------------------------|-------------------------------|---------------------------------------|
| <b>Source:</b>               | Human recombinant MDCK cells                                    | <b>Ligand:</b>                | 0.2 nM [ <sup>125</sup> I] RTI-55     |
| <b>Vehicle:</b>              | 1% DMSO                                                         | <b>Non-Specific Ligand:</b>   | 10 μM Desipramine                     |
| <b>Incubation Time/Temp:</b> | 3 hours @ 4°C                                                   | <b>Specific Binding:</b>      | 75% *                                 |
| <b>Incubation Buffer:</b>    | 50 mM Tris-HCl, pH 7.4, 100 mM NaCl, 1 μM Leupeptin, 10 μM PMSF | <b>Quantiation Method:</b>    | Radioligand Binding                   |
| <b>Kd:</b>                   | 0.024 μM *                                                      | <b>Significance Criteria:</b> | ≥50% of max stimulation or inhibition |
|                              |                                                                 | <b>Bmax:</b>                  | 2.5 pmole/mg Protein *                |

■ **274030** Transporter, Serotonin (5-Hydroxytryptamine) (SERT)

---

|                              |                                               |                               |                                       |
|------------------------------|-----------------------------------------------|-------------------------------|---------------------------------------|
| <b>Source:</b>               | Human recombinant HEK-293 cells               | <b>Ligand:</b>                | 0.4 nM [ <sup>3</sup> H] Paroxetine   |
| <b>Vehicle:</b>              | 1% DMSO                                       | <b>Non-Specific Ligand:</b>   | 10 μM Imipramine                      |
| <b>Incubation Time/Temp:</b> | 60 minutes @ 25°C                             | <b>Specific Binding:</b>      | 95% *                                 |
| <b>Incubation Buffer:</b>    | 50 mM Tris-HCl, pH 7.4, 120 mM NaCl, 5 mM KCl | <b>Quantiation Method:</b>    | Radioligand Binding                   |
| <b>Kd:</b>                   | 0.078 nM *                                    | <b>Significance Criteria:</b> | ≥50% of max stimulation or inhibition |
|                              |                                               | <b>Bmax:</b>                  | 4.4 pmole/mg Protein *                |

\* Historical Values

---

## Reference Compounds

| Cat #  | Assay Name                                 | Reference Compound                | IC <sub>50</sub> * | K <sub>i</sub> | n   | Batch* | IC <sub>50</sub> * |
|--------|--------------------------------------------|-----------------------------------|--------------------|----------------|-----|--------|--------------------|
| 200510 | Adenosine A <sub>1</sub>                   | R(-)-PIA                          | 0.83 μM            | 0.49 μM        | 0.9 | 305599 | 0.42 μM            |
| 200610 | Adenosine A <sub>2A</sub>                  | CGS-21680                         | 0.13 μM            | 0.079 μM       | 1   | 305600 | 0.11 μM            |
| 200720 | Adenosine A <sub>3</sub>                   | IB-MECA                           | 0.78 nM            | 0.72 nM        | 0.8 | 305602 | 1.08 nM            |
| 203100 | Adrenergic α <sub>1A</sub>                 | Prazosin                          | 0.69 nM            | 0.28 nM        | 0.9 | 305613 | 0.25 nM            |
| 203200 | Adrenergic α <sub>1B</sub>                 | Prazosin                          | 0.27 nM            | 0.15 nM        | 1   | 305614 | 0.23 nM            |
| 203400 | Adrenergic α <sub>1D</sub>                 | Prazosin                          | 0.88 nM            | 0.43 nM        | 0.7 | 305615 | 0.84 nM            |
| 203620 | Adrenergic α <sub>2A</sub>                 | Tofimidine                        | 8.4 nM             | 3.1 nM         | 0.9 | 305616 | 4.9 nM             |
| 204010 | Adrenergic β <sub>1</sub>                  | S(-)-Propranolol                  | 2.5 nM             | 1.4 nM         | 0.8 | 305603 | 0.88 nM            |
| 204110 | Adrenergic β <sub>2</sub>                  | S(-)-Propranolol                  | 0.78 nM            | 0.54 nM        | 1.2 | 305604 | 0.4 nM             |
| 285010 | Androgen (Testosterone) AR                 | Testosterone                      | 6.5 nM             | 4.3 nM         | 1   | 305773 | 4.88 nM            |
| 212510 | Bradykinin B <sub>1</sub>                  | (Des-Arg <sup>10</sup> )-Kallidin | 0.87 nM            | 0.22 nM        | 1.1 | 305625 | 0.31 nM            |
| 212620 | Bradykinin B <sub>2</sub>                  | Bradykinin                        | 1.8 nM             | 1.1 nM         | 1   | 305626 | 1.28 nM            |
| 214510 | Calcium Channel L-Type, Benzothiazepine    | Diltiazem                         | 0.036 μM           | 0.032 μM       | 0.9 | 305776 | 0.02 μM            |
| 214600 | Calcium Channel L-Type, Dihydropyridine    | Nitrendipine                      | 0.72 nM            | 0.46 nM        | 0.9 | 305794 | 0.24 nM            |
| 216000 | Calcium Channel N-Type                     | ω-Conotoxin GVIA                  | 0.034 nM           | 0.028 nM       | 1.6 | 305795 | 0.031 nM           |
| 217030 | Cannabinoid CB <sub>1</sub>                | R(+)-WIN-55,212-2                 | 0.2 μM             | 0.15 μM        | 0.7 | 305621 | 0.17 μM            |
| 219500 | Dopamine D <sub>1</sub>                    | R(+)-SCH-23390                    | 1.4 nM             | 0.7 nM         | 0.9 | 305797 | 0.95 nM            |
| 219700 | Dopamine D <sub>2S</sub>                   | Spiperone                         | 0.25 nM            | 0.089 nM       | 1   | 305798 | 0.22 nM            |
| 219800 | Dopamine D <sub>3</sub>                    | Spiperone                         | 0.36 nM            | 0.12 nM        | 0.9 | 305799 | 0.41 nM            |
| 219900 | Dopamine D <sub>4,2</sub>                  | Spiperone                         | 0.5 nM             | 0.2 nM         | 0.9 | 305800 | 0.3 nM             |
| 224010 | Endothelin ET <sub>A</sub>                 | Endothelin-1                      | 0.23 nM            | 0.14 nM        | 1.1 | 305622 | 0.094 nM           |
| 224110 | Endothelin ET <sub>B</sub>                 | Endothelin-1                      | 0.13 nM            | 0.06 nM        | 0.9 | 305623 | 0.059 nM           |
| 225510 | Epidermal Growth Factor (EGF)              | EGF (human)                       | 1.6 nM             | 1.1 nM         | 1.1 | 305638 | 3.69 nM            |
| 226010 | Estrogen ERα                               | Diethylstilbestrol                | 0.77 nM            | 0.22 nM        | 1   | 305716 | 0.98 nM            |
| 226600 | GABA <sub>A</sub> , Flunitrazepam, Central | Diazepam                          | 0.016 μM           | 0.013 μM       | 0.8 | 305802 | 0.019 μM           |
| 226500 | GABA <sub>A</sub> , Muscimol, Central      | GABA                              | 0.032 μM           | 0.026 μM       | 0.9 | 305801 | 0.024 μM           |
| 228610 | GABA <sub>B1A</sub>                        | CGP-54626                         | 6.4 nM             | 2.9 nM         | 1   | 305888 | 3.56 nM            |
| 232030 | Glucocorticoid                             | Dexamethasone                     | 3.8 nM             | 1.8 nM         | 0.9 | 305774 | 5.27 nM            |
| 232700 | Glutamate, Kainate                         | L-Glutamic acid                   | 0.24 μM            | 0.17 μM        | 0.8 | 305634 | 0.16 μM            |
| 232810 | Glutamate, NMDA, Agonism                   | L-Glutamic acid                   | 0.41 μM            | 0.37 μM        | 0.9 | 305632 | 0.17 μM            |
| 232910 | Glutamate, NMDA, Glycine                   | MDL 105,519                       | 0.022 μM           | 0.021 μM       | 0.6 | 305635 | 9.34 nM            |
| 233000 | Glutamate, NMDA, Phencyclidine             | Dizocilpine ((+)-MK-801)          | 5.1 nM             | 3.4 nM         | 0.7 | 305803 | 3.86 nM            |
| 239610 | Histamine H <sub>1</sub>                   | Pyrilamine                        | 3.3 nM             | 1.6 nM         | 1   | 305804 | 2.59 nM            |
| 239710 | Histamine H <sub>2</sub>                   | Tiotidine                         | 0.022 μM           | 0.018 μM       | 1.1 | 305805 | 0.027 μM           |
| 239820 | Histamine H <sub>3</sub>                   | R(-)-α-Methylhistamine (RAMH)     | 2.3 nM             | 1.1 nM         | 1.1 | 305806 | 1.05 nM            |
| 241000 | Imidazoline I <sub>2</sub> , Central       | Idazoxan                          | 0.012 μM           | 8 nM           | 1   | 305807 | 7 nM               |
| 243520 | Interleukin IL-1                           | IL-1β                             | 0.19 nM            | 0.14 nM        | 1.3 | 305639 | 0.36 nM            |

\* Batch: Represents compounds tested concurrently in the same assay(s).

|        |                                                        |                                                  |          |          |     |        |          |
|--------|--------------------------------------------------------|--------------------------------------------------|----------|----------|-----|--------|----------|
| 250460 | Leukotriene, Cysteinyl CysLT <sub>1</sub>              | LTD <sub>4</sub>                                 | 0.7 nM   | 0.29 nM  | 1   | 305750 | 1.24 nM  |
| 251600 | Melatonin MT <sub>1</sub>                              | Melatonin                                        | 0.21 nM  | 0.11 nM  | 0.7 | 305752 | 0.31 nM  |
| 252610 | Muscarinic M <sub>1</sub>                              | 4-DAMP                                           | 4.5 nM   | 1.1 nM   | 1   | 305608 | 4.67 nM  |
| 252710 | Muscarinic M <sub>2</sub>                              | 4-DAMP                                           | 0.055 μM | 0.023 μM | 1   | 305609 | 0.035 μM |
| 252810 | Muscarinic M <sub>3</sub>                              | 4-DAMP                                           | 5.1 nM   | 2.5 nM   | 1.1 | 305610 | 2.29 nM  |
| 257010 | Neuropeptide Y Y <sub>1</sub>                          | Neuropeptide Y (human, rat)                      | 0.22 nM  | 0.21 nM  | 1.1 | 305636 | 0.51 nM  |
| 257110 | Neuropeptide Y Y <sub>2</sub>                          | Neuropeptide Y (13-36)<br>(porcine)              | 0.21 nM  | 0.12 nM  | 0.9 | 305637 | 0.49 nM  |
| 258590 | Nicotinic Acetylcholine                                | Epibatidine                                      | 0.076 nM | 0.052 nM | 0.9 | 305811 | 0.078 nM |
| 258700 | Nicotinic Acetylcholine α,<br>Bungarotoxin             | α-Bungarotoxin                                   | 1.1 nM   | 0.72 nM  | 1.1 | 305812 | 1.93 nM  |
| 260130 | Opiate δ <sub>1</sub> (OP1, DOP)                       | Naltrindole                                      | 0.91 nM  | 0.16 nM  | 1   | 305631 | 1.12 nM  |
| 260210 | Opiate κ(OP2, KOP)                                     | U-69593                                          | 0.016 μM | 6.4 nM   | 0.5 | 305988 | 0.012 μM |
| 260410 | Opiate μ(OP3, MOP)                                     | DAMGO                                            | 0.02 μM  | 8.1 nM   | 0.6 | 305815 | 0.038 μM |
| 264500 | Phorbol Ester                                          | PMA                                              | 0.79 nM  | 0.59 nM  | 1   | 305816 | 1.08 nM  |
| 265010 | Platelet Activating Factor (PAF)                       | PAF                                              | 0.28 nM  | 0.15 nM  | 0.9 | 305687 | 0.25 nM  |
| 265600 | Potassium Channel [K <sub>ATP</sub> ]                  | Glyburide                                        | 5.7 nM   | 0.65 nM  | 0.8 | 305817 | 4.13 nM  |
| 265900 | Potassium Channel hERG                                 | Astemizole                                       | 2.6 nM   | 2.1 nM   | 1.1 | 305818 | 3.69 nM  |
| 268420 | Prostanoid EP <sub>4</sub>                             | Prostaglandin E <sub>2</sub> (PGE <sub>2</sub> ) | 1.1 nM   | 0.45 nM  | 0.9 | 305819 | 1.25 nM  |
| 268700 | Purinergic P <sub>2X</sub>                             | α, β-Methylene ATP                               | 0.082 μM | 0.018 μM | 1.1 | 305713 | 0.029 μM |
| 268810 | Purinergic P <sub>2Y</sub>                             | ATP                                              | 0.018 μM | 0.018 μM | 0.9 | 305714 | 0.019 μM |
| 270000 | Rolipram                                               | Rolipram                                         | 5.7 nM   | 2.1 nM   | 1   | 305820 | 3.24 nM  |
| 271110 | Serotonin (5-Hydroxytryptamine)<br>5-HT <sub>1A</sub>  | Metergoline                                      | 4.1 nM   | 2.3 nM   | 0.9 | 305821 | 1.93 nM  |
| 271700 | Serotonin (5-Hydroxytryptamine)<br>5-HT <sub>2B</sub>  | Ketanserin                                       | 0.29 μM  | 0.18 μM  | 0.6 | 305822 | 0.41 μM  |
| 271910 | Serotonin (5-Hydroxytryptamine)<br>5-HT <sub>3</sub>   | MDL 72222                                        | 0.011 μM | 2.5 nM   | 0.8 | 305720 | 0.017 μM |
| 278110 | Sigma σ <sub>1</sub>                                   | Haloperidol                                      | 0.021 μM | 8.8 nM   | 0.9 | 305823 | 6.99 nM  |
| 255520 | Tachykinin NK <sub>1</sub>                             | L-703,606                                        | 3.6 nM   | 2.6 nM   | 1   | 305810 | 7.25 nM  |
| 285900 | Thyroid Hormone                                        | Triiodothyronine                                 | 0.034 nM | 0.018 nM | 1   | 305624 | 0.04 nM  |
| 220320 | Transporter, Dopamine (DAT)                            | GBR-12909                                        | 1.7 nM   | 1.3 nM   | 0.9 | 305619 | 0.8 nM   |
| 226400 | Transporter, GABA                                      | NO-711                                           | 0.2 μM   | 0.2 μM   | 1.1 | 305882 | 0.21 μM  |
| 204410 | Transporter, Norepinephrine (NET)                      | Desipramine                                      | 0.93 nM  | 0.92 nM  | 0.6 | 305618 | 0.67 nM  |
| 274030 | Transporter, Serotonin<br>(5-Hydroxytryptamine) (SERT) | Fluoxetine                                       | 8.6 nM   | 1.4 nM   | 0.9 | 305620 | 6.95 nM  |

\* Batch: Represents compounds tested concurrently in the same assay(s).
